# Supplementary material for: The effect of drop-in centers on access to HIV testing, case finding, and condom use among female sex workers in Addis Ababa, Ethiopia
Source: PeerJ journal article supplement (doi:10.7717/peerj.16144), 2023-10-17
Supplement: Annex_2.pdf [file Annex_2.pdf]

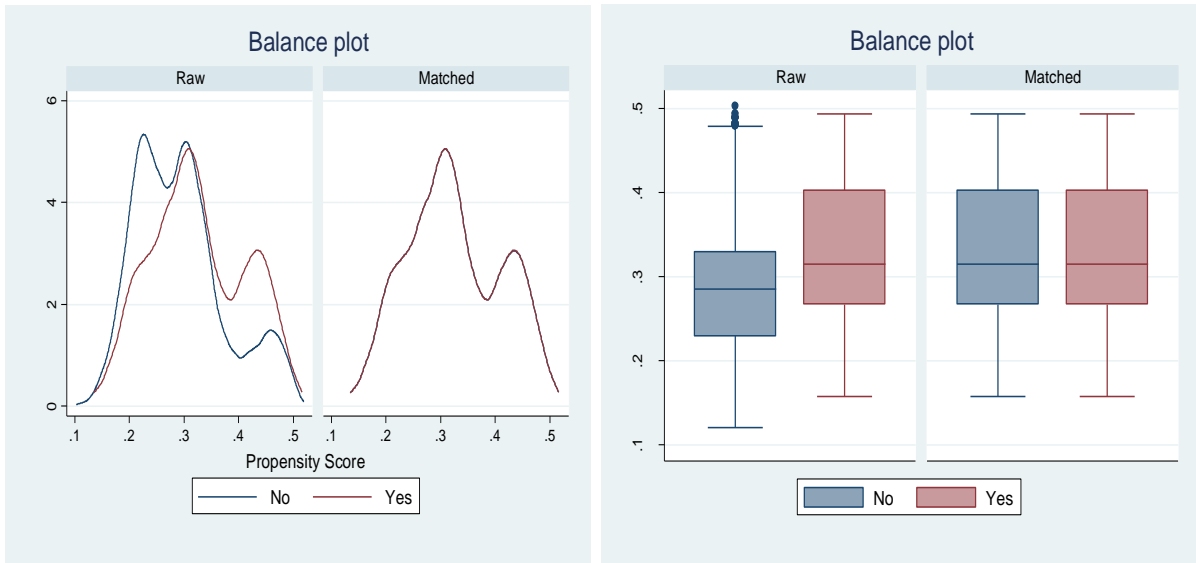

Fig 1: Propensity score density and box balance plot of FSWs in Addis Ababa, 2020
