# Supplementary material for: The effect of drop-in centers on access to HIV testing, case finding, and condom use among female sex workers in Addis Ababa, Ethiopia
Source: PeerJ. 2023 Oct 17;11:e16144. doi: 10.7717/peerj.16144 (PMC10588723; doi:10.7717/peerj.16144)
Supplement: Supplemental Information 3 [file peerj-11-16144-s003.xls]

## Sheet: PSM Data
Access to DIC	Age	Education	Ever married	Monthly Income	Ever drink alcohol	Propensity_score	Ever tested for HIV	HIV staus	Aware HIV+ status (1 for Yes)	Consistent condom use	Combined (1 for ever tested + finding HIV positive + aware of their HIV status + use condom consistently, 0 otherwise)	___weight (1 for covariate balance)
No	35	Yes	No	Yes	Yes	0.170037	Yes	Yes	1	No	1
Yes	28	Yes	Yes	Yes	Yes	0.201847	Yes	No	0	No	0	1
Yes	30	Yes	No	No	No	0.407902	Yes	No	0	No	0	1
Yes	22	Yes	Yes	No	Yes	0.321229	Yes	No	0	No	0	1
Yes	24	Yes	No	No	No	0.448224	Yes	No	0	No	0	1
Yes	34	Yes	Yes	No	Yes	0.253937	Yes	No	0	No	0	1
No	28	Yes	No	No	Yes	0.282674	Yes	No	0	No	0
No	36	Yes	Yes	No	Yes	0.243671	Yes	Yes	1	No	1
No	22	Yes	No	Yes	Yes	0.226479	Yes	No	0	No	0	1
No	19	Yes	No	Yes	No	0.369963	Yes	No	0	No	0	1
Yes	17	Yes	No	No	Yes	0.347713	Yes	No	0	No	0	1
Yes	20	Yes	No	No	No	0.475524	Yes	No	0	No	0	1
No	26	Yes	Yes	No	No	0.439185	Yes	No	0	No	0	1
No	20	Yes	No	No	Yes	0.329266	Yes	No	0	No	0
No	17	Yes	No	Yes	Yes	0.251436	No	No		No	0	1
Yes	20	Yes	No	No	Yes	0.329266	Yes	No	0	No	0	1
No	29	Yes	Yes	No	Yes	0.280821	Yes	No	0	No	0
Yes	19	Yes	No	No	No	0.482379	Yes	No	0	No	0	1
Yes	23	Yes	Yes	Yes	Yes	0.224879	Yes	No	0	No	0	1
No	26	Yes	Yes	Yes	Yes	0.210842	Yes	No	0	No	0
No	36	Yes	Yes	No	Yes	0.243671	Yes	No	0	No	0	1
Yes	25	No	No	No	No	0.431491	Yes	Yes	1	No	1	1
Yes	32	Yes	No	No	Yes	0.260937	Yes	No	0	No	0	1
Yes	23	Yes	Yes	No	No	0.459571	Yes	No	0	No	0	1
No	19	Yes	Yes	No	Yes	0.339454	Yes	No	0	No	0	1
Yes	25	Yes	No	No	No	0.441441	Yes	Yes	1	No	1	1
Yes	17	Yes	No	Yes	No	0.382856	Yes	No	0	No	0	1
Yes	30	No	Yes	No	No	0.402565	Yes	Yes	1	No	1	1
No	27	Yes	No	No	Yes	0.288276	Yes	No	0	No	0
Yes	29	No	Yes	No	Yes	0.272723	Yes	Yes	0	No	0	1
Yes	25	Yes	Yes	No	No	0.445961	Yes	Yes	1	No	1	1
Yes	29	Yes	Yes	No	No	0.419003	Yes	Yes	1	No	1	1
No	28	No	Yes	No	Yes	0.278205	Yes	No	0	No	0	1
Yes	26	Yes	No	No	Yes	0.293944	Yes	No	0	No	0	1
No	24	No	No	Yes	Yes	0.210205	Yes	No	0	No	0	1
Yes	37	Yes	Yes	No	Yes	0.238644	Yes	Yes	1	No	1	1
Yes	18	No	Yes	No	Yes	0.336548	Yes	Yes	1	No	1	1
No	24	No	Yes	No	No	0.442754	Yes	No	0	No	0	1
Yes	27	Yes	Yes	No	Yes	0.292047	Yes	Yes	1	Yes	0	1
Yes	27	Yes	No	No	No	0.427943	Yes	Yes	1	No	1	1
No	27	Yes	No	No	Yes	0.288276	Yes	Yes	0	No	0	1
Yes	21	No	No	No	Yes	0.314443	Yes	Yes	1	No	1	1
No	34	Yes	Yes	Yes	Yes	0.176595	Yes	Yes	1	No	1
No	23	Yes	No	No	No	0.455027	Yes	No	0	No	0
No	28	No	No	No	Yes	0.274543	Yes	No	0	No	0
Yes	37	Yes	Yes	No	Yes	0.238644	Yes	Yes	1	No	1	1
No	27	Yes	Yes	Yes	No	0.324362	Yes	No	0	No	0
No	25	Yes	Yes	No	Yes	0.303534	Yes	No	0	No	0
Yes	20	No	No	No	No	0.465446	Yes	No	0	No	0	1
No	20	Yes	No	Yes	Yes	0.236247	Yes	No	0	No	0	1
Yes	27	Yes	No	Yes	No	0.320362	Yes	No	0	No	0	1
Yes	20	No	Yes	No	No	0.470005	Yes	Yes	0	No	0	1
Yes	19	Yes	No	No	Yes	0.33536	Yes	No	0	No	0	1
Yes	22	Yes	Yes	No	No	0.4664	Yes	No	1	No	1	1
Yes	18	Yes	No	No	Yes	0.34151	Yes	No	0	No	0	1
Yes	20	Yes	No	No	No	0.475524	Yes	No	0	No	0	1
Yes	22	No	No	No	No	0.451808	Yes	Yes	1	No	1	1
Yes	22	Yes	No	No	Yes	0.31725	Yes	No	0	No	0	1
Yes	20	Yes	No	No	Yes	0.329266	Yes	No	0	No	0	1
Yes	28	Yes	Yes	No	No	0.425704	Yes	No	0	No	0	1
Yes	28	Yes	Yes	No	Yes	0.286401	Yes	No	0	No	0	1
Yes	29	Yes	Yes	No	Yes	0.280821	Yes	No	0	No	0	1
Yes	24	Yes	No	No	Yes	0.305472	Yes	No	0	No	0	1
Yes	18	Yes	No	Yes	Yes	0.246302	Yes	No	0	No	0	1
Yes	21	Yes	No	No	No	0.468679	Yes	No	0	No	0	1
Yes	26	Yes	Yes	No	Yes	0.297759	Yes	No	0	No	0	1
Yes	23	Yes	Yes	Yes	No	0.348888	Yes	No	0	No	0	1
No	22	Yes	No	No	Yes	0.31725	Yes	No	0	No	0
No	38	No	Yes	No	Yes	0.226523	Yes	No	0	No	0
Yes	25	Yes	Yes	No	No	0.445961	Yes	No	1	Yes	0	1
Yes	24	No	No	Yes	No	0.329562	Yes	Yes	1	No	1	1
No	22	Yes	Yes	No	Yes	0.321229	Yes	No	0	No	0
Yes	27	Yes	No	No	Yes	0.288276	Yes	No	0	No	0	1
Yes	24	Yes	No	No	Yes	0.305472	Yes	No	0	No	0	1
Yes	26	Yes	No	No	No	0.43468	Yes	No	0	No	0	1
No	30	Yes	Yes	Yes	Yes	0.193142	Yes	No	0	No	0
Yes	26	Yes	No	Yes	Yes	0.207812	Yes	No	0	No	0	1
Yes	25	No	No	No	Yes	0.291256	Yes	No	0	No	0	1
Yes	23	Yes	No	No	Yes	0.311331	Yes	Yes	1	No	1	1
Yes	19	Yes	No	Yes	No	0.369963	Yes	No	0	No	0	1
No	19	Yes	No	Yes	Yes	0.241238	Yes	No	0	No	0	1
Yes	25	No	No	No	Yes	0.291256	Yes	No	0	No	0	1
Yes	21	Yes	Yes	Yes	Yes	0.234599	Yes	No	0	No	0	1
Yes	37	Yes	No	Yes	Yes	0.162424	Yes	Yes	1	No	1	1
Yes	24	Yes	No	No	Yes	0.305472	Yes	No	0	No	0	1
No	32	No	Yes	Yes	No	0.286675	Yes	No	0	No	0
Yes	29	Yes	Yes	Yes	Yes	0.197458	Yes	No	0	No	0	1
Yes	27	Yes	No	No	Yes	0.288276	Yes	No	0	No	0	1
Yes	20	Yes	No	Yes	Yes	0.236247	Yes	No	0	No	0	1
No	29	Yes	Yes	No	Yes	0.280821	Yes	No	0	No	0
Yes	29	Yes	No	No	No	0.414552	Yes	No	0	No	0	1
Yes	26	Yes	Yes	No	No	0.439185	Yes	No	0	No	0	1
No	29	Yes	No	No	Yes	0.277138	Yes	No	0	Yes	0
Yes	20	Yes	No	No	Yes	0.329266	Yes	No	0	No	0	1
Yes	30	Yes	Yes	No	No	0.412331	Yes	No	0	No	0	1
Yes	26	Yes	Yes	No	Yes	0.297759	Yes	No	0	No	0	1
No	22	Yes	Yes	No	Yes	0.321229	Yes	No	0	No	0	1
Yes	28	Yes	Yes	No	No	0.425704	Yes	No	0	No	0	1
No	23	No	No	Yes	Yes	0.214801	Yes	No	0	No	0
Yes	20	Yes	Yes	No	No	0.480093	Yes	No	0	No	0	1
Yes	20	Yes	Yes	No	No	0.480093	Yes	No	0	No	0	1
No	30	Yes	Yes	Yes	Yes	0.193142	Yes	No	0	No	0	1
Yes	27	No	Yes	No	No	0.422531	Yes	No	0	No	0	1
No	17	Yes	No	Yes	Yes	0.251436	Yes	No	0	No	0	1
Yes	25	Yes	Yes	No	Yes	0.303534	Yes	No	0	No	0	1
Yes	28	No	No	No	Yes	0.274543	Yes	No	0	No	0	1
No	22	Yes	Yes	Yes	Yes	0.229703	Yes	No	0	No	0	1
Yes	24	No	Yes	No	No	0.442754	Yes	No	0	No	0	1
No	22	Yes	Yes	Yes	Yes	0.229703	Yes	No	0	No	0
Yes	20	Yes	Yes	No	No	0.480093	Yes	Yes	1	No	1	1
Yes	23	No	No	No	Yes	0.302724	Yes	Yes	0	No	0	1
No	35	No	Yes	No	Yes	0.241285	Yes	No	0	No	0
Yes	25	No	No	No	Yes	0.291256	Yes	No	0	No	0	1
No	19	No	No	Yes	Yes	0.233911	Yes	No	0	No	0	1
Yes	30	No	Yes	No	No	0.402565	Yes	Yes	0	No	0	1
Yes	30	No	Yes	No	No	0.402565	Yes	Yes	1	No	1	1
No	25	Yes	No	No	Yes	0.299677	Yes	No	0	No	0
Yes	25	Yes	Yes	No	Yes	0.303534	Yes	No	0	No	0	1
Yes	23	Yes	Yes	No	No	0.459571	Yes	No	0	No	0	1
No	24	No	Yes	Yes	Yes	0.213261	Yes	No	0	No	0
No	25	Yes	No	No	Yes	0.299677	Yes	No	0	No	0
No	20	Yes	Yes	Yes	Yes	0.239567	Yes	Yes	0	No	0
No	20	Yes	Yes	No	Yes	0.333323	Yes	No	0	No	0
No	25	Yes	No	No	Yes	0.299677	Yes	No	0	No	0	1
Yes	21	Yes	Yes	Yes	No	0.361468	Yes	No	0	No	0	1
No	25	Yes	No	No	Yes	0.299677	Yes	No	0	No	0
Yes	27	No	Yes	Yes	Yes	0.199763	Yes	No	0	No	0	1
No	25	Yes	No	No	Yes	0.299677	Yes	No	0	No	0
No	28	Yes	Yes	Yes	No	0.318372	Yes	Yes	0	No	0
No	25	Yes	No	No	Yes	0.299677	Yes	No	0	No	0
No	25	Yes	No	No	Yes	0.299677	Yes	No	0	No	0	1
No	25	Yes	No	No	Yes	0.299677	Yes	No	0	No	0
No	24	Yes	No	No	Yes	0.305472	Yes	No	0	No	0	1
No	22	No	No	No	Yes	0.308553	Yes	No	0	No	0
No	23	Yes	Yes	No	Yes	0.31527	Yes	No	0	No	0	1
Yes	45	Yes	Yes	Yes	No	0.226497	Yes	Yes	0	No	0	1
No	27	No	Yes	No	Yes	0.283754	Yes	No	0	No	0	1
Yes	25	Yes	No	No	No	0.441441	Yes	No	0	No	0	1
No	23	Yes	Yes	Yes	Yes	0.224879	Yes	No	0	No	0
No	23	Yes	No	Yes	Yes	0.221703	Yes	No	0	No	0	1
Yes	30	Yes	Yes	No	Yes	0.275307	Yes	No	0	No	0	1
No	25	Yes	No	Yes	Yes	0.21237	Yes	No	0	No	0	1
Yes	26	Yes	No	Yes	Yes	0.207812	Yes	No	0	No	0	1
No	28	Yes	No	No	Yes	0.282674	Yes	No	0	No	0
No	26	Yes	No	Yes	Yes	0.207812	Yes	No	0	No	0	1
Yes	29	No	Yes	Yes	No	0.303817	Yes	No	0	No	0	1
No	35	Yes	Yes	No	Yes	0.248768	Yes	No	0	No	0
No	20	Yes	No	No	Yes	0.329266	Yes	No	0	No	0
No	26	Yes	No	Yes	Yes	0.207812	Yes	No	0	No	0	1
No	22	Yes	No	Yes	Yes	0.226479	Yes	No	0	No	0	1
Yes	27	Yes	No	Yes	Yes	0.203326	Yes	No	0	No	0	1
No	20	No	No	No	Yes	0.320394	Yes	No	0	No	0
No	23	Yes	Yes	Yes	Yes	0.224879	Yes	Yes	0	No	0	1
No	28	Yes	Yes	No	No	0.425704	Yes	No	0	No	0
Yes	23	No	No	No	Yes	0.302724	Yes	Yes	1	No	1	1
No	24	Yes	Yes	Yes	No	0.342674	Yes	No	0	No	0
No	25	Yes	Yes	No	Yes	0.303534	Yes	No	0	No	0
No	38	No	Yes	No	Yes	0.226523	Yes	Yes	1	Yes	0
No	22	Yes	No	No	Yes	0.31725	Yes	No	0	No	0	1
No	19	Yes	No	Yes	Yes	0.241238	Yes	No	0	No	0	1
Yes	19	Yes	No	No	Yes	0.33536	Yes	No	0	No	0	1
No	29	Yes	No	No	Yes	0.277138	Yes	No	0	No	0
No	35	Yes	Yes	No	Yes	0.248768	Yes	No	0	No	0	1
Yes	24	No	No	No	Yes	0.296958	Yes	No	0	No	0	1
No	30	Yes	Yes	Yes	Yes	0.193142	Yes	No	0	No	0
Yes	23	Yes	No	Yes	No	0.34474	No	No		No	0	1
No	23	Yes	Yes	No	Yes	0.31527	Yes	No	0	No	0	1
No	19	Yes	No	No	Yes	0.33536	Yes	No	0	No	0
Yes	30	Yes	No	No	No	0.407902	Yes	No	0	No	0	1
No	20	Yes	Yes	No	No	0.480093	Yes	No	0	Yes	0
Yes	35	Yes	Yes	Yes	Yes	0.172637	Yes	No	0	No	0	1
No	32	Yes	Yes	No	Yes	0.264484	Yes	Yes	0	Yes	0
No	23	Yes	Yes	Yes	Yes	0.224879	Yes	No	0	No	0	1
No	23	No	No	No	Yes	0.302724	No	No		No	0
No	30	No	Yes	No	No	0.402565	Yes	No	0	No	0	1
Yes	27	No	Yes	No	No	0.422531	Yes	No	0	No	0	1
Yes	30	No	No	No	No	0.398169	Yes	No	0	No	0	1
No	17	Yes	No	No	Yes	0.347713	No	No		No	0	1
No	28	Yes	Yes	No	No	0.425704	Yes	Yes	0	No	0
No	38	Yes	Yes	Yes	Yes	0.161183	Yes	Yes	0	No	0	1
Yes	33	No	Yes	No	Yes	0.251484	Yes	Yes	0	No	0	1
No	17	No	No	Yes	Yes	0.243899	Yes	No	0	No	0	1
No	17	Yes	No	Yes	Yes	0.251436	Yes	No	0	No	0
No	18	Yes	No	Yes	Yes	0.246302	Yes	No	0	Yes	0
No	34	Yes	Yes	No	Yes	0.253937	Yes	No	0	No	0
Yes	28	Yes	Yes	No	Yes	0.286401	Yes	No	0	No	0	1
Yes	30	Yes	Yes	No	No	0.412331	Yes	No	0	No	0	1
Yes	20	Yes	No	No	Yes	0.329266	Yes	No	0	No	0	1
No	24	Yes	No	No	Yes	0.305472	Yes	No	0	No	0	1
Yes	31	Yes	No	No	Yes	0.266268	Yes	No	0	No	0	1
Yes	22	Yes	No	Yes	Yes	0.226479	Yes	No	0	Yes	0	1
No	18	No	No	No	Yes	0.332472	Yes	No	0	No	0	1
Yes	24	Yes	No	No	Yes	0.305472	Yes	No	0	No	0	1
No	16	No	No	Yes	Yes	0.248999	Yes	No	0	No	0	1
Yes	24	Yes	No	No	Yes	0.305472	Yes	No	0	No	0	1
No	16	Yes	No	Yes	Yes	0.256641	Yes	No	0	No	0	1
Yes	22	Yes	No	No	Yes	0.31725	Yes	Yes	0	No	0	1
Yes	22	Yes	No	Yes	Yes	0.226479	Yes	No	0	No	0	1
Yes	27	Yes	Yes	No	Yes	0.292047	Yes	No	0	No	0	1
Yes	25	Yes	No	No	No	0.441441	Yes	No	0	No	0	1
No	28	Yes	Yes	No	No	0.425704	Yes	No	0	No	0	1
No	25	Yes	No	Yes	Yes	0.21237	Yes	No	0	No	0
Yes	18	Yes	No	No	Yes	0.34151	Yes	No	0	No	0	1
Yes	25	No	No	No	Yes	0.291256	Yes	Yes	1	No	1	1
No	26	Yes	Yes	Yes	Yes	0.210842	Yes	No		No	0	1
No	25	Yes	Yes	Yes	Yes	0.215449	Yes	No	0	No	0
Yes	25	No	Yes	No	Yes	0.29505	Yes	No	0	No	0	1
Yes	20	Yes	Yes	Yes	Yes	0.239567	Yes	No	0	No	0	1
No	19	Yes	No	No	Yes	0.33536	Yes	No	0	No	0	1
Yes	17	Yes	No	No	Yes	0.347713	Yes	No	0	No	0	1
No	18	Yes	Yes	No	Yes	0.34564	Yes	No	0	No	0	1
No	19	Yes	No	Yes	Yes	0.241238	Yes	No	0	No	0
No	27	Yes	No	Yes	Yes	0.203326	Yes	No	0	No	0
No	20	Yes	No	Yes	Yes	0.236247	Yes	Yes		No	0
Yes	24	Yes	No	No	Yes	0.305472	Yes	No	0	No	0	1
Yes	28	Yes	No	No	Yes	0.282674	Yes	No	0	No	0	1
Yes	18	Yes	Yes	Yes	Yes	0.249717	Yes	No	0	No	0	1
Yes	21	Yes	No	No	Yes	0.323229	Yes	No	0	No	0	1
No	25	Yes	No	Yes	Yes	0.21237	Yes	No	0	No	0
Yes	21	Yes	No	Yes	Yes	0.231327	Yes	No	0	No	0	1
Yes	18	Yes	No	No	No	0.48924	Yes	No	0	No	0	1
No	18	Yes	No	Yes	Yes	0.246302	Yes	No	0	No	0
Yes	20	No	No	No	No	0.465446	Yes	No	0	No	0	1
No	21	Yes	No	No	No	0.468679	Yes	No	0	No	0
No	21	Yes	No	Yes	Yes	0.231327	Yes	No	0	No	0
Yes	23	Yes	No	Yes	Yes	0.221703	Yes	No	0	No	0	1
Yes	21	Yes	No	No	Yes	0.323229	Yes	No	0	No	0	1
No	24	Yes	No	Yes	Yes	0.217	Yes	No	0	No	0
Yes	30	No	Yes	Yes	Yes	0.186916	Yes	No	0	No	0	1
No	37	Yes	Yes	No	Yes	0.238644	Yes	No	0	No	0
No	28	Yes	No	No	Yes	0.282674	Yes	No	0	No	0	1
No	28	No	No	No	Yes	0.274543	Yes	No	0	No	0
Yes	26	Yes	No	Yes	Yes	0.207812	Yes	No	0	No	0	1
Yes	38	Yes	Yes	Yes	Yes	0.161183	Yes	No	0	No	0	1
No	26	Yes	No	No	Yes	0.293944	Yes	No	0	No	0
Yes	25	Yes	No	No	Yes	0.299677	Yes	No	0	No	0	1
Yes	26	Yes	No	No	Yes	0.293944	Yes	No	0	No	0	1
No	27	Yes	No	Yes	Yes	0.203326	Yes	No	0	No	0
Yes	36	Yes	No	No	No	0.368782	Yes	No	0	No	0	1
No	28	Yes	Yes	Yes	Yes	0.201847	Yes	No	0	No	0
Yes	20	Yes	No	No	Yes	0.329266	Yes	No	0	No	0	1
Yes	28	Yes	No	No	Yes	0.282674	Yes	No	0	No	0	1
No	27	Yes	No	No	Yes	0.288276	Yes	No	0	No	0	1
Yes	27	Yes	Yes	No	No	0.432432	Yes	Yes	0	No	0	1
Yes	25	Yes	Yes	No	No	0.445961	Yes	No	0	No	0	1
No	28	No	Yes	No	Yes	0.278205	Yes	No	0	Yes	0
Yes	28	No	Yes	No	Yes	0.278205	Yes	Yes	0	No	0	1
No	20	Yes	No	Yes	No	0.363584	Yes	No	0	No	0
No	32	No	Yes	No	No	0.389426	Yes	No	0	No	0
Yes	28	Yes	No	No	No	0.421233	Yes	Yes	1	No	1	1
No	32	Yes	Yes	No	No	0.399087	Yes	No	0	No	0	1
Yes	19	Yes	No	No	Yes	0.33536	Yes	No	0	No	0	1
No	22	Yes	No	No	Yes	0.31725	Yes	No	0	No	0
No	20	Yes	No	Yes	No	0.363584	Yes	No	0	No	0
No	19	Yes	No	No	Yes	0.33536	Yes	No	0	No	0	1
No	35	No	Yes	No	No	0.370022	Yes	Yes	0	No	0	1
No	38	Yes	Yes	Yes	Yes	0.161183	Yes	Yes	0	Yes	0
No	29	No	No	Yes	Yes	0.188311	Yes	Yes	0	No	0
No	41	Yes	Yes	No	Yes	0.219259	No	Yes		No	0
No	30	Yes	Yes	No	Yes	0.275307	No	Yes		Yes	0
No	28	Yes	No	Yes	Yes	0.198913	Yes	No	0	No	0
No	35	No	Yes	No	Yes	0.241285	Yes	No	0	No	0
No	30	No	Yes	No	No	0.402565	Yes	No	0	No	0
No	34	Yes	Yes	Yes	Yes	0.176595	Yes	No	0	No	0
No	38	No	Yes	No	No	0.351028	No	Yes		Yes	0
No	30	Yes	Yes	No	Yes	0.275307	Yes	No	0	No	0	1
No	45	No	Yes	Yes	Yes	0.132139	Yes	Yes	0	Yes	0
No	23	No	Yes	No	Yes	0.306603	Yes	No	0	No	0	1
Yes	19	Yes	No	No	Yes	0.33536	Yes	Yes	1	Yes	0	1
No	19	Yes	No	No	Yes	0.33536	Yes	No	0	No	0
No	32	No	Yes	No	Yes	0.256689	Yes	Yes	0	No	0	1
Yes	26	Yes	Yes	No	Yes	0.297759	Yes	Yes	1	Yes	0	1
Yes	25	Yes	Yes	No	Yes	0.303534	Yes	Yes	1	No	1	1
No	20	Yes	No	Yes	Yes	0.236247	Yes	No	0	No	0
Yes	20	Yes	No	Yes	Yes	0.236247	Yes	No		No	0	1
No	23	Yes	No	Yes	Yes	0.221703	Yes	No	0	No	0
No	28	No	Yes	Yes	Yes	0.195408	Yes	Yes	0	No	0
Yes	19	Yes	No	No	Yes	0.33536	Yes	No	0	No	0	1
No	22	Yes	Yes	Yes	Yes	0.229703	Yes	No	0	No	0
Yes	19	Yes	No	No	Yes	0.33536	Yes	No	0	No	0	1
No	34	Yes	Yes	Yes	Yes	0.176595	Yes	No	0	No	0	1
No	26	Yes	No	Yes	Yes	0.207812	Yes	No	0	No	0
Yes	22	Yes	No	Yes	Yes	0.226479	Yes	No	0	No	0	1
No	47	Yes	Yes	No	Yes	0.192353	Yes	Yes	0	No	0
Yes	21	Yes	No	No	Yes	0.323229	Yes	No	0	No	0	1
No	28	Yes	No	No	Yes	0.282674	Yes	No	0	No	0	1
Yes	20	Yes	No	No	Yes	0.329266	Yes	No	0	No	0	1
No	28	Yes	Yes	No	Yes	0.286401	Yes	No	0	No	0
No	30	Yes	No	No	Yes	0.271669	Yes	No	0	No	0	1
Yes	21	Yes	No	No	Yes	0.323229	Yes	No	0	No	0	1
No	22	Yes	No	No	No	0.461846	Yes	No	0	No	0	1
Yes	22	Yes	No	No	Yes	0.31725	Yes	No	0	No	0	1
Yes	21	Yes	No	Yes	Yes	0.231327	Yes	No	0	No	0	1
No	24	Yes	No	No	No	0.448224	Yes	No	0	No	0	1
No	21	Yes	No	No	No	0.468679	Yes	No	0	No	0	1
Yes	20	Yes	No	Yes	No	0.363584	Yes	No	0	No	0	1
Yes	22	Yes	No	Yes	Yes	0.226479	Yes	No	0	No	0	1
No	27	Yes	Yes	Yes	No	0.324362	Yes	No	0	No	0
Yes	23	Yes	Yes	Yes	Yes	0.224879	Yes	No	0	No	0	1
No	27	Yes	Yes	Yes	No	0.324362	Yes	No	0	No	0
Yes	18	Yes	No	No	Yes	0.34151	Yes	No	0	No	0	1
No	28	Yes	Yes	Yes	Yes	0.201847	Yes	No	0	No	0
Yes	18	Yes	No	No	No	0.48924	Yes	No	0	No	0	1
No	27	Yes	No	Yes	Yes	0.203326	Yes	No	0	No	0
Yes	19	Yes	No	Yes	Yes	0.241238	Yes	No	0	No	0	1
No	25	No	No	Yes	Yes	0.205681	Yes	No	0	No	0
No	25	No	No	No	Yes	0.291256	Yes	No	0	No	0	1
Yes	22	Yes	No	Yes	Yes	0.226479	No	No		No	0	1
No	20	Yes	No	No	No	0.475524	Yes	No	0	No	0	1
Yes	21	Yes	Yes	No	Yes	0.327247	Yes	No	0	No	0	1
No	19	Yes	Yes	Yes	Yes	0.244606	Yes	No	0	No	0
Yes	25	Yes	No	No	Yes	0.299677	Yes	No	0	No	0	1
Yes	30	No	Yes	No	Yes	0.26731	Yes	No	0	No	0	1
No	25	Yes	No	Yes	Yes	0.21237	No	No		Yes	0
No	24	No	No	No	Yes	0.296958	Yes	No	0	No	0
Yes	17	Yes	No	No	Yes	0.347713	Yes	No	0	No	0	1
No	29	Yes	Yes	Yes	Yes	0.197458	Yes	No	0	No	0
Yes	29	Yes	Yes	No	No	0.419003	Yes	No	0	No	0	1
No	35	No	Yes	No	No	0.370022	Yes	Yes	0	No	0
Yes	25	Yes	No	No	Yes	0.299677	Yes	No	0	No	0	1
Yes	32	No	Yes	Yes	No	0.286675	Yes	No	0	No	0	1
Yes	29	No	Yes	No	No	0.409188	Yes	No	0	No	0	1
No	23	No	No	Yes	No	0.335659	Yes	No	0	No	0
Yes	28	Yes	Yes	No	Yes	0.286401	Yes	No	0	No	0	1
Yes	22	Yes	No	Yes	Yes	0.226479	Yes	No	0	No	0	1
No	30	Yes	Yes	No	Yes	0.275307	Yes	Yes	0	No	0	1
No	25	No	No	No	No	0.431491	Yes	No	0	No	0
Yes	19	Yes	No	No	Yes	0.33536	Yes	No	0	No	0	1
No	25	Yes	No	No	Yes	0.299677	Yes	No	0	No	0	1
No	35	Yes	Yes	Yes	Yes	0.172637	Yes	No	0	No	0
No	30	No	No	No	Yes	0.263739	Yes	No	0	No	0	1
No	28	Yes	No	No	Yes	0.282674	Yes	No	0	No	0	1
Yes	25	Yes	No	No	Yes	0.299677	Yes	No	0	No	0	1
No	24	Yes	No	No	Yes	0.305472	Yes	No	0	No	0
Yes	19	Yes	No	Yes	No	0.369963	Yes	No	0	No	0	1
Yes	24	Yes	No	Yes	Yes	0.217	Yes	No	0	No	0	1
Yes	18	Yes	No	Yes	Yes	0.246302	Yes	No	0	No	0	1
No	23	Yes	No	No	Yes	0.311331	Yes	No	0	No	0	1
No	24	Yes	No	Yes	Yes	0.217	Yes	No	0	No	0
Yes	19	Yes	No	No	Yes	0.33536	Yes	No	0	No	0	1
No	27	Yes	No	No	Yes	0.288276	Yes	No	0	No	0	1
Yes	22	Yes	Yes	Yes	Yes	0.229703	Yes	Yes	0	No	0	1
Yes	29	Yes	Yes	Yes	Yes	0.197458	Yes	No	0	No	0	1
No	25	Yes	No	No	Yes	0.299677	Yes	No	0	No	0	1
Yes	23	Yes	Yes	No	Yes	0.31527	Yes	No	0	No	0	1
No	31	No	No	Yes	Yes	0.180058	Yes	No	0	No	0	1
Yes	19	Yes	No	No	Yes	0.33536	Yes	No	0	No	0	1
No	29	Yes	Yes	Yes	Yes	0.197458	Yes	No	0	No	0
No	28	No	Yes	No	Yes	0.278205	Yes	No	0	No	0	1
Yes	29	Yes	Yes	No	Yes	0.280821	Yes	No	0	No	0	1
No	23	Yes	No	Yes	Yes	0.221703	Yes	No	0	No	0
Yes	25	Yes	No	No	Yes	0.299677	Yes	No	0	No	0	1
No	25	Yes	Yes	No	No	0.445961	Yes	No	0	No	0	1
No	28	Yes	No	Yes	No	0.314411	Yes	No	0	No	0	1
Yes	30	Yes	Yes	No	Yes	0.275307	Yes	No	0	No	0	1
No	21	Yes	No	Yes	Yes	0.231327	Yes	No	0	No	0	1
Yes	30	Yes	No	No	Yes	0.271669	No	Yes		No	0	1
Yes	24	Yes	No	Yes	Yes	0.217	Yes	No	0	No	0	1
No	35	Yes	Yes	Yes	Yes	0.172637	Yes	No	0	No	0
No	32	No	No	No	No	0.385081	Yes	No	0	No	0	1
Yes	29	Yes	No	No	Yes	0.277138	Yes	No	0	No	0	1
Yes	37	Yes	Yes	Yes	Yes	0.164931	Yes	Yes	1	No	1	1
Yes	21	Yes	No	Yes	Yes	0.231327	Yes	No	0	No	0	1
Yes	20	Yes	No	Yes	Yes	0.236247	Yes	No	0	No	0	1
No	24	No	Yes	No	Yes	0.300795	Yes	No	0	No	0
Yes	20	Yes	No	No	Yes	0.329266	No	No		No	0	1
No	22	Yes	Yes	Yes	Yes	0.229703	Yes	No	0	No	0	1
No	20	No	No	No	No	0.465446	Yes	No	0	No	0	1
Yes	31	Yes	No	No	No	0.401285	No	No		No	0	1
Yes	23	Yes	No	No	Yes	0.311331	Yes	No	0	No	0	1
No	20	Yes	No	Yes	No	0.363584	Yes	No	0	No	0	1
No	25	No	No	No	No	0.431491	Yes	No	0	No	0	1
Yes	31	Yes	No	No	Yes	0.266268	Yes	No	0	No	0	1
No	45	Yes	Yes	No	No	0.317273	Yes	No	0	No	0	1
Yes	30	No	Yes	No	Yes	0.26731	Yes	No	0	No	0	1
No	23	Yes	Yes	Yes	No	0.348888	Yes	No	0	No	0
No	26	Yes	Yes	Yes	Yes	0.210842	Yes	No	0	No	0	1
Yes	20	No	No	Yes	No	0.354275	Yes	Yes	1	No	1	1
No	24	Yes	Yes	Yes	Yes	0.220128	Yes	No	0	No	0
Yes	22	No	Yes	No	No	0.456347	Yes	No	0	No	0	1
No	29	No	No	Yes	Yes	0.188311	Yes	No	0	No	0	1
No	25	No	No	Yes	Yes	0.205681	Yes	No	0	No	0	1
Yes	25	No	No	No	Yes	0.291256	Yes	Yes	1	No	1	1
No	23	Yes	No	Yes	Yes	0.221703	Yes	No	0	No	0	1
No	38	Yes	Yes	Yes	Yes	0.161183	Yes	Yes	0	Yes	0
Yes	27	Yes	No	No	No	0.427943	Yes	No	0	No	0	1
No	48	No	No	No	No	0.287512	No	Yes		Yes	0
No	19	Yes	No	Yes	Yes	0.241238	Yes	No	0	No	0	1
Yes	23	Yes	Yes	No	Yes	0.31527	Yes	No	0	No	0	1
No	20	Yes	Yes	Yes	No	0.367831	Yes	No	0	No	0	1
Yes	24	Yes	No	No	Yes	0.305472	Yes	No	0	No	0	1
No	17	Yes	No	Yes	Yes	0.251436	No	No		No	0	1
No	20	Yes	No	No	Yes	0.329266	Yes	No	0	No	0
No	23	Yes	No	Yes	No	0.34474	Yes	No		No	0
Yes	30	Yes	No	No	No	0.407902	Yes	Yes	1	No	1	1
No	17	Yes	No	No	Yes	0.347713	Yes	No	0	No	0
Yes	40	No	Yes	Yes	No	0.243918	Yes	No	0	No	0	1
No	22	Yes	No	Yes	Yes	0.226479	Yes	No	0	No	0
No	35	No	Yes	Yes	Yes	0.166935	Yes	No	0	No	0
Yes	21	Yes	No	No	Yes	0.323229	Yes	No	0	No	0	1
No	23	Yes	No	Yes	No	0.34474	Yes	No	0	No	0	1
No	19	No	No	No	No	0.472286	No	No		No	0
No	35	No	Yes	No	Yes	0.241285	No	Yes		No	0
Yes	25	Yes	No	No	Yes	0.299677	Yes	No	0	No	0	1
No	24	No	No	Yes	Yes	0.210205	Yes	No	0	No	0	1
No	24	Yes	Yes	Yes	Yes	0.220128	Yes	No	0	No	0
Yes	27	Yes	Yes	Yes	Yes	0.206308	Yes	Yes	0	No	0	1
Yes	35	Yes	Yes	Yes	Yes	0.172637	No	Yes		No	0	1
No	27	Yes	No	No	No	0.427943	Yes	No	0	No	0
No	27	Yes	No	Yes	Yes	0.203326	Yes	No	0	No	0
Yes	25	No	No	No	No	0.431491	Yes	Yes	0	No	0	1
No	29	Yes	Yes	Yes	Yes	0.197458	Yes	No	0	No	0
No	32	No	Yes	Yes	Yes	0.17871	Yes	No	0	No	0
No	23	Yes	No	Yes	Yes	0.221703	Yes	No	0	No	0	1
Yes	30	Yes	Yes	No	No	0.412331	Yes	No	0	No	0	1
No	28	Yes	No	Yes	No	0.314411	Yes	No	0	No	0	1
No	26	Yes	Yes	Yes	No	0.33041	Yes	No	0	No	0
Yes	30	No	Yes	No	No	0.402565	Yes	No	0	No	0	1
No	28	Yes	Yes	Yes	No	0.318372	Yes	No	0	No	0
Yes	27	Yes	No	Yes	Yes	0.203326	Yes	No	0	No	0	1
No	24	Yes	Yes	Yes	No	0.342674	Yes	No	0	No	0
No	29	No	Yes	Yes	No	0.303817	Yes	No	0	No	0
Yes	21	Yes	No	Yes	No	0.357252	Yes	No	0	No	0	1
No	35	No	Yes	No	No	0.370022	Yes	No	0	No	0
No	22	Yes	Yes	Yes	No	0.355153	Yes	No	0	No	0
Yes	37	Yes	Yes	Yes	Yes	0.164931	Yes	No	0	No	0	1
Yes	28	Yes	No	No	Yes	0.282674	Yes	No	0	No	0	1
No	22	No	Yes	No	Yes	0.312473	Yes	No	0	No	0	1
Yes	23	Yes	No	No	Yes	0.311331	Yes	No	0	No	0	1
No	32	No	Yes	Yes	Yes	0.17871	Yes	No	0	No	0
No	19	Yes	No	Yes	Yes	0.241238	Yes	No	0	No	0
Yes	21	Yes	No	No	No	0.468679	Yes	No	0	No	0	1
No	19	Yes	No	No	Yes	0.33536	Yes	No	0	No	0	1
Yes	24	No	No	No	Yes	0.296958	Yes	No	0	No	0	1
No	23	Yes	No	Yes	Yes	0.221703	Yes	No	0	No	0
Yes	27	Yes	No	No	Yes	0.288276	Yes	No	0	No	0	1
No	35	Yes	Yes	No	No	0.379501	No	Yes		No	0
Yes	23	Yes	No	No	No	0.455027	Yes	No	0	No	0	1
No	23	Yes	No	Yes	Yes	0.221703	Yes	No	0	No	0
Yes	20	Yes	No	No	Yes	0.329266	Yes	Yes	0	No	0	1
No	26	Yes	No	Yes	Yes	0.207812	Yes	No	0	No	0	1
No	25	No	No	Yes	No	0.323522	Yes	No	0	No	0	1
Yes	29	Yes	No	No	No	0.414552	Yes	No	0	No	0	1
No	34	Yes	No	Yes	No	0.280017	Yes	No	0	No	0
No	28	Yes	Yes	Yes	Yes	0.201847	Yes	Yes	0	No	0
Yes	23	Yes	Yes	Yes	Yes	0.224879	Yes	No	0	No	0	1
Yes	30	Yes	Yes	No	Yes	0.275307	Yes	No	0	No	0	1
No	36	Yes	Yes	Yes	Yes	0.168749	Yes	No	0	No	0
Yes	27	No	No	No	No	0.41807	Yes	No	0	No	0	1
No	30	No	Yes	Yes	Yes	0.186916	Yes	Yes	1	No	1	1
No	22	Yes	No	Yes	Yes	0.226479	No	No		No	0
Yes	28	Yes	No	No	Yes	0.282674	Yes	No	0	Yes	0	1
No	22	Yes	No	Yes	Yes	0.226479	Yes	No	0	No	0	1
Yes	27	No	No	No	Yes	0.280047	Yes	No	0	No	0	1
No	30	Yes	No	Yes	Yes	0.190304	Yes	No	0	No	0
No	25	Yes	No	No	Yes	0.299677	Yes	No	0	No	0	1
Yes	24	Yes	No	Yes	Yes	0.217	Yes	No	0	No	0	1
Yes	23	Yes	No	No	Yes	0.311331	Yes	Yes	1	No	1	1
No	25	Yes	Yes	Yes	Yes	0.215449	Yes	No	0	No	0	1
Yes	27	Yes	Yes	Yes	No	0.324362	Yes	No	0	No	0	1
No	27	Yes	No	Yes	Yes	0.203326	Yes	No	0	No	0	1
No	26	Yes	Yes	Yes	Yes	0.210842	Yes	No	0	No	0
Yes	26	Yes	Yes	Yes	No	0.33041	Yes	No	0	No	0	1
No	23	Yes	No	Yes	Yes	0.221703	Yes	No	0	Yes	0
Yes	29	Yes	No	Yes	Yes	0.194573	Yes	No	0	No	0	1
No	22	Yes	Yes	No	No	0.4664	Yes	No	0	No	0
Yes	27	Yes	No	No	No	0.427943	Yes	No	0	No	0	1
No	23	Yes	No	Yes	No	0.34474	Yes	No	0	No	0
No	24	Yes	Yes	Yes	Yes	0.220128	Yes	No	0	No	0	1
Yes	27	Yes	No	No	Yes	0.288276	Yes	No	0	No	0	1
No	24	Yes	No	Yes	Yes	0.217	Yes	No	0	No	0
Yes	18	Yes	No	Yes	No	0.376387	Yes	No	0	No	0	1
No	23	Yes	No	Yes	No	0.34474	Yes	No	0	No	0
Yes	22	Yes	No	Yes	Yes	0.226479	Yes	No	0	No	0	1
No	26	No	Yes	Yes	Yes	0.20419	Yes	No	0	No	0
Yes	27	Yes	No	Yes	Yes	0.203326	Yes	No	0	No	0	1
Yes	21	Yes	No	Yes	Yes	0.231327	Yes	No	0	No	0	1
No	24	Yes	Yes	No	No	0.452757	Yes	No	0	No	0	1
Yes	27	Yes	Yes	Yes	Yes	0.206308	Yes	No	0	No	0	1
No	24	Yes	Yes	Yes	Yes	0.220128	Yes	No	0	No	0	1
No	30	Yes	Yes	Yes	Yes	0.193142	Yes	No	0	No	0	1
Yes	28	Yes	Yes	No	No	0.425704	Yes	No	0	No	0	1
No	25	Yes	No	Yes	No	0.332439	Yes	Yes	0	No	0
Yes	22	Yes	Yes	Yes	Yes	0.229703	Yes	No	0	No	0	1
No	27	Yes	Yes	Yes	Yes	0.206308	Yes	No	0	No	0
No	23	Yes	Yes	Yes	No	0.348888	Yes	No	0	No	0	1
No	27	Yes	Yes	Yes	Yes	0.206308	Yes	No	0	No	0
Yes	25	Yes	Yes	Yes	No	0.336515	Yes	No	0	No	0	1
No	24	Yes	No	Yes	Yes	0.217	Yes	No	0	Yes	0
No	25	Yes	No	No	Yes	0.299677	Yes	No	0	No	0
Yes	47	No	Yes	No	No	0.29698	Yes	Yes	0	Yes	0	1
No	20	Yes	No	No	Yes	0.329266	No	Yes		No	0
No	30	No	No	Yes	Yes	0.184149	Yes	No	0	No	0
Yes	29	Yes	Yes	Yes	Yes	0.197458	Yes	No	0	No	0	1
No	33	Yes	Yes	Yes	No	0.289339	Yes	No	0	No	0	1
No	35	No	Yes	Yes	Yes	0.166935	Yes	No	0	No	0
No	32	Yes	No	Yes	Yes	0.181983	Yes	No	0	No	0
No	26	Yes	No	No	Yes	0.293944	Yes	No	0	No	0	1
Yes	34	Yes	Yes	Yes	No	0.283724	Yes	No	0	No	0	1
No	21	Yes	No	Yes	Yes	0.231327	Yes	No	0	No	0
Yes	20	Yes	No	Yes	No	0.363584	Yes	No	0	No	0	1
No	25	Yes	No	No	No	0.441441	No	No		No	0
No	33	No	Yes	Yes	Yes	0.174714	Yes	No	0	No	0
No	19	Yes	No	Yes	Yes	0.241238	Yes	No	0	No	0
No	20	Yes	No	No	Yes	0.329266	Yes	No	0	No	0
No	23	Yes	Yes	Yes	Yes	0.224879	Yes	No	0	No	0
No	18	No	No	Yes	No	0.36694	Yes	No	0	No	0
No	19	Yes	No	No	No	0.482379	Yes	No	0	No	0	1
No	22	Yes	No	Yes	No	0.35097	Yes	No	0	No	0	1
No	26	Yes	No	Yes	No	0.326371	Yes	No	0	No	0
No	29	Yes	No	Yes	No	0.308521	Yes	No	0	No	0	1
Yes	22	No	Yes	Yes	No	0.345943	Yes	No	0	No	0	1
No	20	Yes	No	Yes	No	0.363584	Yes	No	0	No	0	1
No	23	No	Yes	Yes	No	0.339755	Yes	No	0	No	0
No	32	No	Yes	No	No	0.389426	Yes	No	0	No	0	1
Yes	33	Yes	No	Yes	Yes	0.17793	Yes	No	0	No	0	1
No	20	Yes	Yes	Yes	Yes	0.239567	Yes	No	0	No	0
Yes	39	Yes	Yes	Yes	Yes	0.157504	Yes	Yes	1	No	1	1
No	27	Yes	Yes	No	Yes	0.292047	Yes	No	0	No	0
Yes	27	No	No	Yes	Yes	0.196852	Yes	No	0	No	0	1
No	18	Yes	Yes	No	No	0.493816	Yes	No	0	No	0	1
Yes	25	Yes	No	Yes	Yes	0.21237	Yes	No	0	No	0	1
No	24	Yes	Yes	Yes	Yes	0.220128	Yes	No	0	No	0
Yes	38	Yes	No	No	No	0.356089	Yes	Yes	1	No	1	1
No	28	Yes	Yes	Yes	Yes	0.201847	Yes	No	0	Yes	0
No	25	No	No	No	No	0.431491	Yes	Yes	0	No	0	1
Yes	26	Yes	No	Yes	No	0.326371	Yes	No	0	No	0	1
No	24	Yes	Yes	Yes	No	0.342674	Yes	No	0	No	0
No	23	Yes	No	Yes	Yes	0.221703	Yes	No	0	No	0
Yes	22	Yes	No	Yes	Yes	0.226479	Yes	No	0	No	0	1
No	27	Yes	No	Yes	Yes	0.203326	Yes	No	0	No	0	1
Yes	18	Yes	Yes	Yes	Yes	0.249717	Yes	Yes	1	No	1	1
Yes	28	Yes	Yes	Yes	Yes	0.201847	Yes	Yes	1	No	1	1
Yes	25	Yes	No	Yes	No	0.332439	Yes	No	0	No	0	1
Yes	25	Yes	Yes	Yes	Yes	0.215449	Yes	No	0	No	0	1
No	34	No	Yes	Yes	Yes	0.170789	Yes	No	0	No	0
Yes	40	Yes	Yes	No	No	0.347737	Yes	Yes	1	No	1	1
No	21	Yes	Yes	Yes	No	0.361468	Yes	No	0	No	0	1
Yes	28	Yes	Yes	No	No	0.425704	Yes	Yes	1	No	1	1
No	30	No	Yes	No	No	0.402565	Yes	Yes	0	No	0	1
Yes	20	Yes	Yes	No	Yes	0.333323	Yes	No	0	No	0	1
Yes	28	No	Yes	No	No	0.415844	Yes	Yes	1	No	1	1
No	20	Yes	No	Yes	No	0.363584	Yes	No	0	No	0
No	28	Yes	No	Yes	Yes	0.198913	Yes	No	0	No	0	1
Yes	38	No	Yes	No	No	0.351028	Yes	Yes	1	No	1	1
Yes	24	Yes	No	Yes	Yes	0.217	Yes	No	0	No	0	1
No	23	Yes	No	Yes	Yes	0.221703	Yes	Yes	0	No	0
No	50	Yes	No	Yes	Yes	0.11948	No	No		No	0	1
Yes	21	Yes	No	No	No	0.468679	Yes	No	0	No	0	1
No	36	Yes	Yes	Yes	Yes	0.168749	Yes	No	0	No	0
Yes	23	Yes	No	No	No	0.455027	Yes	No	0	No	0	1
No	27	Yes	Yes	No	No	0.432432	Yes	No	0	No	0
No	28	Yes	Yes	Yes	Yes	0.201847	Yes	No	0	No	0	1
Yes	24	No	No	No	No	0.438241	Yes	No	0	No	0	1
No	25	Yes	Yes	Yes	Yes	0.215449	Yes	No	0	No	0
No	20	No	No	Yes	No	0.354275	Yes	Yes	0	No	0	1
Yes	23	No	No	No	No	0.445014	Yes	No	0	No	0	1
Yes	29	No	No	No	No	0.404768	Yes	No	0	No	0	1
Yes	30	No	No	No	Yes	0.263739	Yes	No	0	No	0	1
Yes	20	Yes	No	Yes	Yes	0.236247	Yes	No	0	No	0	1
Yes	23	Yes	Yes	No	Yes	0.31527	Yes	No	0	No	0	1
Yes	23	No	No	No	No	0.445014	Yes	No	0	No	0	1
No	22	Yes	Yes	Yes	No	0.355153	Yes	No	0	No	0
No	28	Yes	No	Yes	Yes	0.198913	Yes	No	0	No	0
Yes	21	Yes	No	No	No	0.468679	Yes	No	0	No	0	1
No	25	Yes	Yes	Yes	Yes	0.215449	Yes	No	0	No	0
No	21	Yes	No	No	Yes	0.323229	Yes	No	0	No	0	1
Yes	25	Yes	No	No	Yes	0.299677	Yes	No	0	No	0	1
No	23	Yes	No	Yes	Yes	0.221703	Yes	No	0	No	0
Yes	30	No	Yes	No	Yes	0.26731	Yes	No	0	No	0	1
No	25	Yes	No	No	Yes	0.299677	Yes	No	0	No	0	1
No	28	No	Yes	No	Yes	0.278205	Yes	Yes	1	No	1
Yes	35	Yes	Yes	No	Yes	0.248768	Yes	No	0	No	0	1
No	35	Yes	Yes	Yes	Yes	0.172637	Yes	Yes	0	No	0
No	22	Yes	Yes	Yes	Yes	0.229703	Yes	No	0	No	0	1
Yes	35	Yes	No	No	No	0.375198	Yes	No	0	No	0	1
No	26	Yes	Yes	Yes	Yes	0.210842	Yes	No	0	No	0
No	27	Yes	Yes	Yes	Yes	0.206308	Yes	Yes	0	No	0
Yes	30	Yes	Yes	No	No	0.412331	Yes	Yes	1	No	1	1
No	26	Yes	Yes	Yes	Yes	0.210842	Yes	No	0	No	0
Yes	21	Yes	No	No	No	0.468679	Yes	No	0	No	0	1
No	20	No	No	No	Yes	0.320394	Yes	No	0	No	0	1
No	30	Yes	No	Yes	Yes	0.190304	Yes	No	0	No	0
Yes	26	Yes	Yes	No	No	0.439185	Yes	No	0	Yes	0	1
No	22	Yes	No	Yes	No	0.35097	Yes	No	0	No	0
Yes	24	Yes	No	No	No	0.448224	Yes	No	0	No	0	1
Yes	25	No	No	No	No	0.431491	Yes	No	0	No	0	1
No	22	Yes	No	Yes	Yes	0.226479	Yes	No	0	No	0
Yes	28	Yes	No	No	No	0.421233	Yes	No	0	No	0	1
No	21	Yes	No	Yes	Yes	0.231327	Yes	No	0	No	0
No	22	Yes	Yes	Yes	Yes	0.229703	Yes	No	0	No	0	1
Yes	30	Yes	No	No	No	0.407902	Yes	Yes	0	No	0	1
No	35	Yes	No	No	Yes	0.245362	Yes	No	0	No	0
No	40	No	Yes	No	Yes	0.217043	Yes	No	0	No	0
No	21	Yes	No	Yes	Yes	0.231327	Yes	No	0	No	0
Yes	24	No	Yes	No	Yes	0.300795	Yes	No	0	No	0	1
Yes	38	Yes	No	No	No	0.356089	Yes	No	0	No	0	1
No	26	Yes	No	Yes	Yes	0.207812	Yes	No	0	No	0
No	26	Yes	No	No	Yes	0.293944	Yes	No	0	No	0	1
Yes	24	Yes	No	No	No	0.448224	Yes	No	0	No	0	1
No	24	Yes	Yes	Yes	No	0.342674	Yes	No	0	No	0
Yes	40	Yes	Yes	No	No	0.347737	Yes	Yes	1	No	1	1
Yes	28	Yes	No	No	No	0.421233	Yes	No	0	No	0	1
No	21	Yes	Yes	Yes	No	0.361468	Yes	No	0	No	0	1
No	16	Yes	No	Yes	No	0.389366	Yes	No	0	No	0
Yes	28	Yes	Yes	No	Yes	0.286401	Yes	No	0	No	0	1
No	18	Yes	No	No	No	0.48924	Yes	No	0	No	0	1
Yes	23	Yes	No	No	No	0.455027	Yes	No	0	No	0	1
No	19	Yes	No	No	Yes	0.33536	Yes	No	0	No	0	1
Yes	23	No	Yes	No	No	0.449541	Yes	No	0	No	0	1
No	23	No	Yes	Yes	No	0.339755	Yes	No	0	No	0
No	29	No	Yes	Yes	Yes	0.191126	Yes	No	0	No	0
Yes	25	Yes	Yes	No	No	0.445961	Yes	No	0	Yes	0	1
Yes	39	Yes	No	No	No	0.349817	Yes	Yes	1	No	1	1
No	24	Yes	Yes	Yes	Yes	0.220128	Yes	No	0	No	0	1
Yes	34	Yes	Yes	No	No	0.385989	Yes	Yes	1	No	1	1
No	28	No	No	No	No	0.411403	Yes	Yes	0	No	0	1
No	36	No	Yes	Yes	Yes	0.16315	Yes	No		No	0
Yes	30	Yes	Yes	No	No	0.412331	Yes	Yes	1	No	1	1
Yes	28	Yes	No	No	No	0.421233	Yes	Yes	1	No	1	1
No	30	No	Yes	No	No	0.402565	Yes	No	0	No	0	1
No	30	Yes	Yes	Yes	Yes	0.193142	Yes	No	0	No	0
Yes	34	No	Yes	No	No	0.376447	Yes	Yes	1	No	1	1
No	24	Yes	No	No	No	0.448224	Yes	No	0	No	0
No	22	Yes	No	Yes	Yes	0.226479	Yes	No	0	No	0	1
Yes	36	Yes	No	No	Yes	0.240312	Yes	No	0	No	0	1
No	23	Yes	No	No	Yes	0.311331	Yes	No	0	No	0	1
Yes	33	Yes	Yes	No	No	0.392519	Yes	No	0	No	0	1
No	23	Yes	Yes	Yes	Yes	0.224879	Yes	Yes	1	No	1
Yes	24	No	No	No	No	0.438241	Yes	No	0	No	0	1
No	20	Yes	No	Yes	No	0.363584	Yes	No	0	No	0	1
Yes	23	No	Yes	No	Yes	0.306603	Yes	No	0	No	0	1
Yes	30	Yes	No	No	No	0.407902	Yes	No	0	No	0	1
No	27	No	No	No	Yes	0.280047	Yes	No	0	No	0
Yes	26	No	Yes	No	No	0.429247	Yes	No	0	No	0	1
No	26	Yes	Yes	Yes	No	0.33041	Yes	No	0	No	0
Yes	25	Yes	No	No	Yes	0.299677	Yes	No	0	No	0	1
No	22	Yes	No	No	No	0.461846	No	No		No	0
Yes	24	Yes	No	No	Yes	0.305472	No	No		No	0	1
No	21	Yes	No	Yes	Yes	0.231327	Yes	No	0	No	0
No	22	Yes	No	No	Yes	0.31725	Yes	No	0	No	0
Yes	22	Yes	No	Yes	Yes	0.226479	Yes	No	0	No	0	1
Yes	20	Yes	Yes	Yes	No	0.367831	Yes	No	0	No	0	1
Yes	20	Yes	No	Yes	No	0.363584	Yes	No	0	No	0	1
Yes	18	Yes	Yes	No	No	0.493816	Yes	No	0	No	0	1
Yes	28	Yes	Yes	No	Yes	0.286401	Yes	No	0	No	0	1
Yes	25	No	Yes	No	Yes	0.29505	Yes	No	0	No	0	1
Yes	33	Yes	Yes	No	No	0.392519	Yes	No	0	No	0	1
Yes	30	No	Yes	Yes	No	0.298039	Yes	Yes	1	No	1	1
Yes	25	Yes	Yes	Yes	No	0.336515	Yes	Yes	1	No	1	1
Yes	24	Yes	No	Yes	No	0.338562	Yes	No	0	No	0	1
Yes	29	Yes	Yes	No	No	0.419003	Yes	No	0	Yes	0	1
Yes	21	Yes	No	Yes	No	0.357252	Yes	No	0	No	0	1
Yes	35	No	No	No	No	0.365764	Yes	No	0	No	0	1
Yes	18	Yes	No	Yes	No	0.376387	Yes	No	0	No	0	1
Yes	31	No	Yes	No	Yes	0.261965	Yes	No	0	No	0	1
Yes	24	Yes	Yes	Yes	No	0.342674	Yes	No	0	No	0	1
Yes	35	Yes	Yes	No	Yes	0.248768	Yes	Yes	1	No	1	1
Yes	24	Yes	No	Yes	No	0.338562	Yes	No	0	No	0	1
Yes	28	No	Yes	Yes	Yes	0.195408	Yes	Yes	1	Yes	0	1
Yes	24	No	No	No	No	0.438241	Yes	No	0	No	0	1
Yes	32	Yes	Yes	No	No	0.399087	Yes	No	0	No	0	1
Yes	28	Yes	Yes	No	Yes	0.286401	Yes	Yes	1	No	1	1
Yes	25	Yes	No	No	No	0.441441	Yes	Yes	1	Yes	0	1
Yes	28	Yes	Yes	Yes	No	0.318372	Yes	Yes	1	Yes	0	1
Yes	33	Yes	Yes	No	No	0.392519	Yes	No	0	No	0	1
Yes	32	Yes	Yes	No	No	0.399087	Yes	No	0	No	0	1
Yes	29	No	Yes	No	No	0.409188	Yes	No	0	No	0	1
Yes	32	Yes	No	No	No	0.394704	Yes	No	0	No	0	1
Yes	28	Yes	Yes	No	No	0.425704	Yes	No	0	No	0	1
Yes	23	Yes	No	No	No	0.455027	Yes	No	0	No	0	1
Yes	22	Yes	No	No	No	0.461846	Yes	No	0	No	0	1
Yes	25	Yes	Yes	No	No	0.445961	Yes	No	0	Yes	0	1
Yes	33	Yes	Yes	No	Yes	0.259175	Yes	No	0	No	0	1
No	27	Yes	No	No	Yes	0.288276	Yes	No	0	No	0	1
No	22	Yes	No	No	Yes	0.31725	Yes	Yes	1	Yes	0
Yes	38	Yes	Yes	No	Yes	0.23369	Yes	Yes	1	No	1	1
No	28	Yes	Yes	No	Yes	0.286401	Yes	No	0	No	0
No	24	Yes	Yes	Yes	Yes	0.220128	Yes	Yes	1	No	1	1
No	31	Yes	Yes	No	Yes	0.269861	No	No		No	0	1
No	27	Yes	Yes	Yes	Yes	0.206308	Yes	Yes	1	No	1
No	25	Yes	No	No	Yes	0.299677	Yes	Yes	1	Yes	0
No	30	Yes	Yes	No	Yes	0.275307	Yes	No	0	Yes	0	1
No	24	Yes	Yes	No	Yes	0.309371	Yes	No	0	No	0	1
No	35	Yes	Yes	No	Yes	0.248768	Yes	Yes	1	No	1
No	25	Yes	No	Yes	Yes	0.21237	Yes	No	0	Yes	0
No	27	Yes	Yes	No	Yes	0.292047	Yes	No	0	No	0	1
No	24	Yes	No	Yes	Yes	0.217	Yes	No	0	No	0
No	34	No	Yes	No	Yes	0.246349	Yes	Yes	0	No	0	1
No	28	Yes	No	Yes	Yes	0.198913	Yes	No	0	No	0	1
No	33	Yes	No	Yes	Yes	0.17793	No	Yes		No	0	1
No	28	Yes	Yes	No	Yes	0.286401	Yes	No	0	No	0	1
No	21	Yes	No	No	Yes	0.323229	No	No		No	0
No	32	Yes	Yes	Yes	Yes	0.184725	No	No		No	0	1
No	30	Yes	No	No	Yes	0.271669	No	No		No	0
Yes	35	Yes	Yes	No	Yes	0.248768	Yes	No	0	Yes	0	1
No	35	Yes	No	Yes	Yes	0.170037	No	No		No	0
Yes	29	Yes	Yes	No	Yes	0.280821	Yes	No	0	No	0	1
No	23	Yes	Yes	Yes	Yes	0.224879	Yes	No	0	No	0
Yes	32	Yes	Yes	Yes	Yes	0.184725	Yes	No	0	No	0	1
No	30	Yes	Yes	No	Yes	0.275307	Yes	No	0	No	0
No	27	Yes	Yes	No	Yes	0.292047	No	No		No	0	1
No	38	Yes	Yes	Yes	Yes	0.161183	Yes	No	0	No	0
No	30	No	No	Yes	Yes	0.184149	Yes	No	0	No	0
No	24	Yes	No	Yes	Yes	0.217	Yes	No	0	No	0	1
No	25	No	Yes	No	Yes	0.29505	Yes	No	0	No	0
No	19	Yes	Yes	No	Yes	0.339454	Yes	No	0	No	0
No	27	Yes	No	No	Yes	0.288276	Yes	No	0	No	0
Yes	39	Yes	Yes	No	Yes	0.228807	Yes	Yes	0	No	0	1
No	34	Yes	Yes	No	No	0.385989	Yes	No	0	No	0
No	38	Yes	No	Yes	No	0.258411	Yes	No	0	Yes	0
No	30	No	No	No	Yes	0.263739	Yes	Yes	0	Yes	0
No	29	Yes	Yes	Yes	Yes	0.197458	Yes	No	0	No	0
No	30	Yes	No	No	Yes	0.271669	Yes	Yes	0	No	0
No	30	Yes	Yes	Yes	No	0.306571	Yes	Yes	0	No	0
No	29	Yes	Yes	Yes	Yes	0.197458	Yes	No	0	No	0
No	59	No	Yes	No	Yes	0.141262	Yes	No	0	No	0	1
No	22	Yes	No	No	Yes	0.31725	Yes	No	0	No	0	1
No	30	Yes	Yes	Yes	Yes	0.193142	Yes	Yes	0	No	0
No	26	Yes	Yes	Yes	Yes	0.210842	Yes	No	0	No	0
No	23	No	Yes	No	Yes	0.306603	No	No		No	0	1
No	37	Yes	No	Yes	Yes	0.162424	Yes	Yes	0	Yes	0
No	25	Yes	Yes	No	Yes	0.303534	Yes	No	0	No	0
No	19	Yes	No	No	Yes	0.33536	Yes	No	0	Yes	0
No	31	Yes	Yes	No	No	0.405692	Yes	No	0	No	0
No	20	Yes	No	Yes	Yes	0.236247	No	No		Yes	0	1
No	26	Yes	Yes	Yes	Yes	0.210842	No	No		Yes	0
No	36	Yes	Yes	No	Yes	0.243671	Yes	Yes	1	No	1
No	38	Yes	No	No	Yes	0.230427	No	Yes		No	0
No	22	Yes	No	No	Yes	0.31725	Yes	Yes	1	Yes	0	1
No	25	No	Yes	No	Yes	0.29505	Yes	No	0	No	0
No	38	No	Yes	Yes	No	0.254191	Yes	No	0	No	0
No	37	Yes	Yes	No	No	0.366653	Yes	No	0	No	0	1
No	35	Yes	Yes	No	Yes	0.248768	Yes	No	0	No	0
No	27	Yes	No	No	Yes	0.288276	Yes	No	0	Yes	0
No	33	Yes	No	Yes	Yes	0.17793	Yes	No	0	No	0
No	30	Yes	No	No	Yes	0.271669	Yes	No	0	No	0
No	29	Yes	Yes	Yes	Yes	0.197458	No	Yes		Yes	0
No	45	Yes	Yes	No	Yes	0.201032	No	Yes		No	0
No	35	Yes	Yes	Yes	Yes	0.172637	Yes	No	0	No	0
No	37	Yes	No	No	No	0.362412	Yes	No	0	No	0
Yes	25	Yes	No	No	Yes	0.299677	Yes	No	0	No	0	1
No	30	Yes	Yes	Yes	Yes	0.193142	Yes	No	0	No	0	1
No	28	Yes	Yes	Yes	Yes	0.201847	Yes	Yes	0	No	0
No	30	Yes	Yes	No	Yes	0.275307	Yes	No	0	No	0
No	37	Yes	No	Yes	No	0.26371	Yes	No	0	No	0
No	40	Yes	No	No	No	0.343595	Yes	No	0	No	0
No	36	Yes	Yes	No	Yes	0.243671	No	Yes		No	0
No	35	Yes	Yes	No	Yes	0.248768	Yes	No	0	No	0
No	33	Yes	Yes	Yes	Yes	0.180625	No	No		No	0	1
No	27	Yes	Yes	No	Yes	0.292047	No	No		No	0	1
No	30	Yes	Yes	No	No	0.412331	Yes	No	0	No	0	1
No	39	Yes	No	Yes	Yes	0.155089	Yes	No	0	No	0
Yes	35	Yes	Yes	Yes	Yes	0.172637	Yes	Yes	0	Yes	0	1
No	42	Yes	Yes	No	Yes	0.214593	Yes	No	0	No	0
No	42	Yes	No	No	No	0.331315	Yes	No	0	No	0
No	29	Yes	No	Yes	Yes	0.194573	Yes	No	0	No	0
No	19	Yes	No	Yes	Yes	0.241238	Yes	No	0	No	0	1
No	45	Yes	Yes	No	No	0.317273	Yes	No	0	No	0	1
No	28	Yes	No	Yes	Yes	0.198913	Yes	No	0	No	0
No	20	Yes	No	Yes	Yes	0.236247	Yes	No	0	Yes	0
No	28	Yes	Yes	No	Yes	0.286401	Yes	No	0	No	0	1
No	26	Yes	No	No	Yes	0.293944	Yes	No	0	No	0
No	25	Yes	No	No	Yes	0.299677	Yes	No	0	No	0	1
No	24	Yes	No	No	Yes	0.305472	Yes	No	0	No	0
No	40	Yes	No	No	Yes	0.22083	Yes	No	0	No	0
No	35	Yes	No	No	Yes	0.245362	Yes	No	0	No	0	1
Yes	38	No	Yes	No	Yes	0.226523	Yes	No	0	Yes	0	1
No	28	No	Yes	Yes	No	0.309658	Yes	No	0	No	0
No	30	Yes	No	No	Yes	0.271669	Yes	No	0	No	0
No	22	Yes	No	No	Yes	0.31725	Yes	No	0	No	0	1
No	23	Yes	Yes	No	Yes	0.31527	Yes	No	0	No	0	1
No	33	Yes	Yes	No	Yes	0.259175	Yes	No	0	No	0
No	24	Yes	No	Yes	Yes	0.217	No	No		Yes	0
No	26	Yes	No	No	Yes	0.293944	No	No		No	0	1
No	30	Yes	No	No	Yes	0.271669	No	Yes		No	0
No	37	Yes	No	No	Yes	0.235333	Yes	No	0	No	0	1
No	28	No	No	No	Yes	0.274543	Yes	No	0	No	0
Yes	23	Yes	No	No	Yes	0.311331	Yes	No	0	No	0	1
No	20	Yes	No	No	Yes	0.329266	No	No		No	0
No	27	Yes	Yes	No	Yes	0.292047	Yes	Yes	0	No	0	1
No	26	Yes	No	No	Yes	0.293944	No	No		Yes	0
No	23	No	No	No	Yes	0.302724	Yes	No	0	No	0
Yes	27	Yes	Yes	No	Yes	0.292047	Yes	No	0	No	0	1
No	28	No	No	No	Yes	0.274543	Yes	No	0	No	0	1
No	32	Yes	No	No	Yes	0.260937	Yes	No	0	No	0
No	21	Yes	Yes	Yes	No	0.361468	Yes	No	0	Yes	0	1
No	28	Yes	Yes	No	Yes	0.286401	Yes	No	0	No	0
No	28	Yes	Yes	Yes	No	0.318372	Yes	No	0	No	0
No	26	No	Yes	No	Yes	0.289369	No	Yes		No	0
No	27	No	Yes	No	No	0.422531	Yes	No	0	No	0	1
Yes	25	No	No	No	Yes	0.291256	Yes	No	0	No	0	1
No	21	Yes	No	No	Yes	0.323229	No	No		No	0	1
No	32	Yes	No	No	Yes	0.260937	Yes	No	0	No	0	1
No	51	Yes	Yes	No	No	0.282695	No	Yes		Yes	0
Yes	37	Yes	Yes	Yes	Yes	0.164931	Yes	Yes	0	No	0	1
No	45	Yes	Yes	No	No	0.317273	No	Yes		No	0
No	39	Yes	Yes	No	Yes	0.228807	Yes	No	0	No	0
No	30	Yes	No	Yes	No	0.302693	Yes	No	0	No	0
No	27	Yes	No	Yes	Yes	0.203326	Yes	No	0	No	0
No	22	Yes	No	No	Yes	0.31725	Yes	No	0	No	0
Yes	20	Yes	No	Yes	Yes	0.236247	No	No		No	0	1
No	30	Yes	Yes	No	Yes	0.275307	Yes	No	0	No	0
No	23	Yes	No	No	No	0.455027	Yes	No	0	No	0	1
No	22	Yes	No	No	No	0.461846	Yes	No	0	No	0
No	27	Yes	Yes	No	Yes	0.292047	Yes	Yes	0	No	0
No	39	Yes	Yes	No	Yes	0.228807	Yes	No	0	No	0
No	34	Yes	Yes	No	Yes	0.253937	Yes	No	0	No	0	1
Yes	41	Yes	No	No	Yes	0.21614	Yes	No	0	Yes	0	1
No	24	Yes	No	No	Yes	0.305472	Yes	No	0	Yes	0	1
No	35	Yes	Yes	No	Yes	0.248768	Yes	Yes	0	No	0
No	23	Yes	Yes	Yes	Yes	0.224879	Yes	No	0	No	0
No	38	Yes	Yes	No	Yes	0.23369	Yes	No	0	No	0
No	29	Yes	No	No	Yes	0.277138	Yes	No	0	Yes	0
No	38	Yes	Yes	No	Yes	0.23369	Yes	No	0	No	0	1
No	28	Yes	No	Yes	Yes	0.198913	Yes	No	0	Yes	0
No	38	Yes	Yes	No	Yes	0.23369	Yes	No	0	No	0
No	21	Yes	No	No	Yes	0.323229	Yes	No	0	No	0
No	38	No	No	No	No	0.346868	Yes	No	0	No	0	1
No	30	Yes	No	No	Yes	0.271669	No	No		No	0	1
No	29	Yes	Yes	No	Yes	0.280821	Yes	No		No	0	1
No	34	Yes	No	No	Yes	0.250483	Yes	No	0	No	0	1
No	24	Yes	No	No	Yes	0.305472	Yes	No	0	No	0	1
No	28	Yes	Yes	No	Yes	0.286401	Yes	No	0	No	0	1
No	23	Yes	No	No	Yes	0.311331	Yes	No	0	No	0	1
No	19	Yes	No	No	Yes	0.33536	Yes	No	0	No	0
No	30	Yes	Yes	No	Yes	0.275307	Yes	No	0	Yes	0
No	25	No	Yes	No	Yes	0.29505	No	No		No	0
No	19	Yes	No	No	Yes	0.33536	Yes	Yes	1	No	1
No	19	Yes	No	Yes	Yes	0.241238	Yes	No	0	No	0
No	35	Yes	Yes	No	No	0.379501	Yes	Yes	1	Yes	0
No	22	Yes	No	No	Yes	0.31725	Yes	No	0	No	0	1
No	19	Yes	No	No	No	0.482379	Yes	No	0	No	0	1
No	30	Yes	Yes	Yes	Yes	0.193142	Yes	No	0	No	0	1
No	25	Yes	No	No	Yes	0.299677	Yes	No	0	No	0
No	28	Yes	Yes	No	Yes	0.286401	Yes	Yes	1	No	1
Yes	27	Yes	No	Yes	Yes	0.203326	Yes	No	0	No	0	1
No	35	Yes	Yes	No	Yes	0.248768	No	Yes		No	0
No	22	Yes	No	No	Yes	0.31725	Yes	No	0	No	0
No	37	Yes	Yes	No	Yes	0.238644	Yes	No	0	No	0
Yes	20	Yes	No	No	Yes	0.329266	Yes	No	0	No	0	1
No	21	Yes	No	No	Yes	0.323229	Yes	No	0	No	0	1
No	19	Yes	No	No	Yes	0.33536	No	No		Yes	0	1
Yes	35	Yes	Yes	No	Yes	0.248768	Yes	No	0	No	0	1
No	35	Yes	Yes	No	Yes	0.248768	Yes	No	0	No	0	1
No	35	Yes	No	No	Yes	0.245362	Yes	No	0	No	0
No	30	Yes	Yes	No	Yes	0.275307	Yes	No	0	No	0	1
No	28	Yes	No	Yes	Yes	0.198913	Yes	No	0	No	0
No	27	Yes	No	No	Yes	0.288276	No	No		Yes	0
No	37	Yes	No	No	Yes	0.235333	No	No		Yes	0	1
No	32	Yes	No	No	Yes	0.260937	Yes	Yes	0	Yes	0	1
No	32	Yes	Yes	No	Yes	0.264484	Yes	Yes	1	No	1
No	28	Yes	No	No	Yes	0.282674	No	No		No	0	1
No	28	Yes	Yes	No	Yes	0.286401	No	No		Yes	0	1
No	28	Yes	Yes	No	Yes	0.286401	Yes	No		No	0	1
No	35	Yes	Yes	No	Yes	0.248768	Yes	No	0	No	0
No	35	Yes	Yes	No	No	0.379501	Yes	No	0	No	0	1
No	20	Yes	No	No	Yes	0.329266	Yes	No	0	No	0
No	24	Yes	No	No	Yes	0.305472	Yes	No	0	No	0	1
No	30	Yes	Yes	Yes	Yes	0.193142	Yes	No	0	No	0	1
No	36	No	Yes	No	No	0.363642	Yes	No	0	No	0
Yes	36	Yes	No	Yes	Yes	0.166196	Yes	No	0	No	0	1
No	26	Yes	No	No	Yes	0.293944	Yes	No	0	No	0
Yes	28	Yes	Yes	Yes	Yes	0.201847	Yes	No	0	No	0	1
No	40	Yes	Yes	No	No	0.347737	Yes	No		No	0	1
No	32	Yes	Yes	No	Yes	0.264484	Yes	No	0	No	0	1
No	34	Yes	Yes	No	Yes	0.253937	Yes	Yes	1	No	1	1
Yes	33	No	Yes	Yes	Yes	0.174714	Yes	Yes	0	No	0	1
No	35	Yes	Yes	No	No	0.379501	Yes	No	0	No	0
No	21	Yes	Yes	Yes	Yes	0.234599	No	No		No	0
No	40	Yes	Yes	No	No	0.347737	Yes	Yes	0	No	0
No	25	Yes	No	Yes	Yes	0.21237	Yes	No	0	No	0	1
No	20	Yes	No	Yes	Yes	0.236247	Yes	No	0	No	0	1
No	34	Yes	Yes	No	Yes	0.253937	Yes	No	0	No	0
No	19	Yes	No	No	Yes	0.33536	Yes	No	0	No	0
No	21	Yes	No	Yes	Yes	0.231327	Yes	No	0	No	0
No	18	Yes	No	No	Yes	0.34151	No	No		No	0	1
No	35	Yes	No	No	Yes	0.245362	Yes	Yes		No	0
No	37	Yes	Yes	No	No	0.366653	Yes	Yes	1	No	1	1
Yes	24	Yes	No	No	Yes	0.305472	Yes	No	0	Yes	0	1
No	33	Yes	Yes	No	Yes	0.259175	No	Yes		No	0	1
No	29	Yes	No	Yes	No	0.308521	Yes	No	0	No	0	1
No	31	Yes	Yes	No	Yes	0.269861	No	No		Yes	0
No	26	No	Yes	Yes	Yes	0.20419	Yes	No	0	Yes	0
No	33	Yes	No	No	Yes	0.255675	Yes	No	0	No	0
Yes	29	Yes	No	No	No	0.414552	Yes	Yes	0	No	0	1
No	30	No	Yes	No	Yes	0.26731	Yes	No	0	No	0
No	32	Yes	Yes	No	No	0.399087	Yes	No	0	No	0
No	28	Yes	Yes	No	No	0.425704	Yes	No	0	No	0
No	28	Yes	No	No	Yes	0.282674	Yes	Yes	1	No	1
No	35	Yes	Yes	No	Yes	0.248768	Yes	No	0	No	0
No	32	Yes	No	No	Yes	0.260937	Yes	No	0	Yes	0
No	27	Yes	No	No	Yes	0.288276	Yes	No	0	No	0	1
No	40	Yes	Yes	No	Yes	0.223997	Yes	Yes	1	No	1	1
Yes	29	Yes	No	No	Yes	0.277138	Yes	No	0	No	0	1
No	21	Yes	No	No	Yes	0.323229	Yes	No	0	No	0
Yes	27	Yes	No	Yes	Yes	0.203326	Yes	No	0	Yes	0	1
No	29	Yes	No	No	Yes	0.277138	Yes	No	0	No	0
No	38	Yes	Yes	No	No	0.360299	Yes	No	0	No	0
No	31	Yes	Yes	No	Yes	0.269861	Yes	No	0	No	0
No	38	Yes	Yes	No	Yes	0.23369	Yes	Yes		No	0	1
No	37	Yes	Yes	No	No	0.366653	No	Yes		Yes	0
No	32	Yes	No	No	Yes	0.260937	Yes	Yes	1	No	1
No	35	Yes	Yes	No	Yes	0.248768	No	Yes		No	0	1
No	39	No	Yes	No	No	0.344797	Yes	Yes	1	No	1
No	30	Yes	Yes	No	No	0.412331	Yes	Yes	1	No	1	1
No	40	Yes	No	Yes	Yes	0.151524	Yes	No	0	No	0	1
No	31	Yes	Yes	No	No	0.405692	Yes	No	0	No	0	1
No	41	Yes	Yes	No	No	0.341534	Yes	Yes	1	No	1	1
Yes	35	Yes	Yes	Yes	No	0.278175	Yes	Yes	1	No	1	1
No	38	Yes	Yes	No	Yes	0.23369	Yes	Yes	1	No	1
Yes	35	Yes	Yes	Yes	No	0.278175	Yes	Yes	1	No	1	1
No	20	Yes	No	Yes	Yes	0.236247	Yes	No	0	No	0
No	20	Yes	Yes	Yes	Yes	0.239567	Yes	No	0	No	0
No	35	Yes	No	No	Yes	0.245362	Yes	No	0	No	0	1
No	24	Yes	No	No	No	0.448224	Yes	No	0	Yes	0
No	33	Yes	No	No	Yes	0.255675	Yes	No	0	No	0	1
No	34	Yes	Yes	No	Yes	0.253937	No	Yes		Yes	0
No	24	Yes	No	No	Yes	0.305472	No	No		No	0	1
No	28	Yes	No	No	Yes	0.282674	Yes	No	0	No	0
No	22	Yes	No	No	No	0.461846	Yes	No	0	No	0	1
No	35	Yes	No	No	Yes	0.245362	Yes	Yes	1	No	1	1
No	30	Yes	Yes	No	Yes	0.275307	Yes	No	0	No	0	1
No	45	Yes	Yes	No	No	0.317273	No	Yes		No	0
No	38	Yes	No	No	No	0.356089	Yes	No	0	No	0
No	23	Yes	No	Yes	Yes	0.221703	Yes	No	0	No	0	1
No	31	Yes	Yes	No	Yes	0.269861	Yes	Yes	1	No	1	1
No	33	Yes	Yes	No	Yes	0.259175	Yes	Yes	1	No	1
No	22	Yes	No	No	Yes	0.31725	Yes	No	0	No	0	1
No	22	Yes	No	No	No	0.461846	No	No		No	0	1
No	28	Yes	Yes	No	Yes	0.286401	Yes	Yes	1	No	1
No	27	Yes	No	No	Yes	0.288276	Yes	No	0	No	0	1
No	37	Yes	Yes	No	Yes	0.238644	Yes	Yes	1	No	1	1
No	28	No	No	No	Yes	0.274543	Yes	No	0	Yes	0	1
No	25	Yes	No	No	Yes	0.299677	Yes	No	0	No	0
No	22	Yes	No	Yes	Yes	0.226479	Yes	No	0	No	0	1
No	23	Yes	No	No	Yes	0.311331	No	No		No	0	1
No	40	Yes	No	No	No	0.343595	Yes	Yes	1	No	1	1
Yes	37	Yes	Yes	No	Yes	0.238644	Yes	Yes	0	No	0	1
No	36	Yes	No	Yes	Yes	0.166196	Yes	No	0	Yes	0
No	24	Yes	No	No	Yes	0.305472	No	No		No	0	1
No	36	Yes	Yes	No	Yes	0.243671	Yes	No	0	No	0	1
No	38	Yes	Yes	No	No	0.360299	Yes	No	0	No	0
No	27	Yes	No	No	No	0.427943	Yes	No	0	No	0
No	37	Yes	Yes	Yes	Yes	0.164931	Yes	Yes	1	Yes	0
Yes	22	No	No	No	No	0.451808	Yes	No	0	No	0	1
No	20	No	Yes	No	Yes	0.324394	Yes	No	0	No	0
No	27	No	Yes	No	No	0.422531	Yes	No	0	No	0	1
No	22	Yes	Yes	No	Yes	0.321229	Yes	No	0	Yes	0
No	26	Yes	No	Yes	Yes	0.207812	Yes	No	0	Yes	0
No	28	No	Yes	No	Yes	0.278205	No	Yes		No	0	1
No	25	Yes	No	No	No	0.441441	Yes	No	0	No	0	1
No	30	No	No	No	No	0.398169	Yes	No	0	Yes	0
No	28	Yes	Yes	No	Yes	0.286401	Yes	No	0	No	0	1
No	28	Yes	No	No	No	0.421233	Yes	No	0	No	0
No	30	Yes	Yes	No	Yes	0.275307	Yes	Yes	1	No	1
No	39	Yes	No	No	Yes	0.225592	Yes	Yes		No	0
No	35	Yes	No	No	Yes	0.245362	Yes	Yes	0	Yes	0	1
No	36	Yes	Yes	No	No	0.373055	Yes	No	0	No	0
No	31	No	Yes	No	Yes	0.261965	Yes	Yes	0	Yes	0
No	33	No	Yes	No	Yes	0.251484	Yes	No	0	No	0	1
No	32	Yes	Yes	No	Yes	0.264484	Yes	No	0	No	0
No	29	Yes	No	Yes	No	0.308521	Yes	No	0	No	0
No	25	Yes	Yes	No	No	0.445961	Yes	No	0	No	0	1
No	22	Yes	No	Yes	Yes	0.226479	Yes	No	0	No	0
No	36	Yes	Yes	No	Yes	0.243671	Yes	No	0	No	0	1
No	31	No	Yes	Yes	Yes	0.182777	Yes	No	0	No	0	1
No	30	Yes	Yes	No	Yes	0.275307	Yes	No	0	No	0	1
No	37	No	Yes	No	No	0.35731	Yes	No	0	No	0
No	21	Yes	No	No	Yes	0.323229	No	No		No	0	1
No	25	Yes	No	No	No	0.441441	Yes	No	0	No	0
No	35	Yes	No	Yes	No	0.274514	Yes	No	0	No	0
No	32	Yes	Yes	Yes	Yes	0.184725	Yes	No	0	Yes	0	1
No	30	No	No	No	Yes	0.263739	No	Yes		No	0
No	38	Yes	No	No	Yes	0.230427	Yes	No	0	No	0
No	38	Yes	No	No	No	0.356089	Yes	Yes	0	No	0
No	30	Yes	Yes	No	Yes	0.275307	Yes	No	0	Yes	0	1
No	28	Yes	No	No	No	0.421233	Yes	No	0	No	0
No	34	Yes	Yes	Yes	Yes	0.176595	Yes	No	0	Yes	0
No	22	Yes	No	No	Yes	0.31725	Yes	No	0	No	0
No	19	Yes	Yes	Yes	No	0.374241	Yes	No	0	No	0
No	40	Yes	Yes	No	No	0.347737	Yes	Yes	0	No	0
Yes	30	Yes	Yes	No	Yes	0.275307	Yes	No	0	No	0	1
No	25	Yes	No	No	Yes	0.299677	Yes	No	0	No	0	1
No	19	No	No	No	No	0.472286	Yes	No	0	No	0	1
Yes	26	Yes	No	No	Yes	0.293944	Yes	No	0	No	0	1
No	31	Yes	No	No	Yes	0.266268	Yes	No	0	No	0	1
No	23	No	No	No	Yes	0.302724	Yes	Yes	0	No	0	1
No	27	Yes	No	No	Yes	0.288276	Yes	No	0	No	0	1
No	24	Yes	No	No	Yes	0.305472	Yes	No	0	No	0
No	26	Yes	No	No	Yes	0.293944	Yes	Yes	0	No	0	1
No	21	Yes	No	No	Yes	0.323229	Yes	Yes	0	No	0	1
No	22	Yes	No	No	No	0.461846	Yes	No	0	No	0
No	18	Yes	No	Yes	Yes	0.246302	Yes	No		No	0
No	26	Yes	No	Yes	Yes	0.207812	Yes	No	0	No	0
No	38	Yes	No	No	Yes	0.230427	Yes	No	0	No	0	1
No	21	Yes	No	Yes	Yes	0.231327	Yes	No	0	No	0	1
No	30	Yes	No	No	Yes	0.271669	Yes	No	0	No	0	1
No	27	Yes	No	No	Yes	0.288276	Yes	No	0	No	0	1
No	28	Yes	Yes	Yes	Yes	0.201847	Yes	No	0	Yes	0
No	22	Yes	No	No	Yes	0.31725	No	No		No	0
No	27	Yes	No	No	No	0.427943	Yes	No	0	No	0
No	35	Yes	Yes	Yes	Yes	0.172637	Yes	No	0	No	0	1
No	40	Yes	Yes	No	Yes	0.223997	Yes	No	0	Yes	0
No	31	Yes	Yes	No	No	0.405692	No	No		No	0	1
No	29	Yes	No	Yes	Yes	0.194573	Yes	No	0	No	0
No	25	Yes	No	No	Yes	0.299677	Yes	No	0	No	0
No	23	Yes	No	Yes	Yes	0.221703	Yes	No	0	No	0
No	21	Yes	No	Yes	Yes	0.231327	Yes	No	0	No	0	1
No	28	No	No	No	No	0.411403	Yes	Yes	0	No	0	1
No	22	No	Yes	No	Yes	0.312473	Yes	No	0	No	0	1
Yes	25	No	No	No	No	0.431491	Yes	No	0	No	0	1
No	30	No	Yes	No	No	0.402565	No	No		Yes	0	1
No	28	No	Yes	No	No	0.415844	Yes	Yes	1	No	1
No	21	Yes	No	No	No	0.468679	Yes	No	0	No	0
No	20	Yes	No	No	No	0.475524	Yes	No	0	No	0	1
No	32	Yes	No	No	Yes	0.260937	Yes	No	0	No	0
No	39	Yes	Yes	No	Yes	0.228807	Yes	No	0	No	0	1
No	34	Yes	No	No	Yes	0.250483	Yes	Yes	1	No	1	1
Yes	25	Yes	Yes	No	No	0.445961	Yes	No	0	No	0	1
Yes	29	Yes	No	No	Yes	0.277138	Yes	No	0	No	0	1
No	28	Yes	No	No	Yes	0.282674	Yes	No	0	No	0
No	38	Yes	Yes	Yes	No	0.261936	Yes	No	0	No	0
No	28	Yes	Yes	No	Yes	0.286401	Yes	No	0	Yes	0
No	20	Yes	No	No	No	0.475524	Yes	No	0	No	0	1
No	20	Yes	No	No	No	0.475524	Yes	No	0	No	0
No	18	No	No	No	Yes	0.332472	Yes	No	0	No	0
Yes	20	Yes	Yes	No	No	0.480093	Yes	No	0	No	0	1
No	20	Yes	No	No	No	0.475524	Yes	No	0	No	0
No	18	No	Yes	No	Yes	0.336548	Yes	No	0	No	0
No	30	No	No	No	No	0.398169	Yes	No	0	No	0
Yes	30	Yes	No	No	Yes	0.271669	Yes	No	0	No	0	1
No	36	Yes	Yes	No	Yes	0.243671	Yes	Yes		Yes	0
No	21	Yes	Yes	Yes	Yes	0.234599	Yes	No	0	No	0
No	30	No	No	No	No	0.398169	Yes	No	0	No	0
No	21	Yes	No	Yes	Yes	0.231327	Yes	No	0	Yes	0	1
No	22	Yes	No	No	Yes	0.31725	Yes	No	0	No	0	1
No	20	Yes	No	Yes	No	0.363584	Yes	No	0	No	0
No	33	Yes	Yes	Yes	Yes	0.180625	Yes	Yes	0	No	0
No	30	Yes	No	No	Yes	0.271669	Yes	Yes	0	No	0
No	23	Yes	No	No	Yes	0.311331	Yes	No	0	No	0	1
No	20	Yes	No	No	Yes	0.329266	Yes	No	0	No	0	1
No	25	Yes	No	No	Yes	0.299677	No	Yes		No	0
No	21	Yes	No	No	Yes	0.323229	No	No		No	0	1
No	30	Yes	Yes	No	Yes	0.275307	Yes	Yes	0	No	0
No	20	Yes	No	Yes	Yes	0.236247	No	No		Yes	0
No	45	Yes	Yes	Yes	Yes	0.136848	Yes	No	0	No	0	1
No	25	Yes	No	No	Yes	0.299677	Yes	No	0	No	0
No	29	Yes	Yes	No	Yes	0.280821	Yes	No	0	No	0	1
No	25	Yes	Yes	No	Yes	0.303534	Yes	No	0	No	0	1
No	30	Yes	Yes	Yes	Yes	0.193142	Yes	Yes	1	No	1	1
No	23	Yes	No	No	Yes	0.311331	Yes	No	0	Yes	0
No	33	No	No	No	Yes	0.248052	Yes	No	0	No	0
No	31	No	No	Yes	Yes	0.180058	Yes	No	0	No	0	1
No	38	No	Yes	No	Yes	0.226523	Yes	No	0	No	0
No	45	Yes	No	No	Yes	0.198107	No	Yes		Yes	0
No	38	Yes	Yes	Yes	Yes	0.161183	Yes	No	0	Yes	0
No	18	No	No	No	No	0.479136	Yes	No	0	No	0	1
No	25	Yes	Yes	No	No	0.445961	Yes	No	0	No	0
No	20	Yes	Yes	No	No	0.480093	Yes	No	0	No	0	1
Yes	25	No	No	No	No	0.431491	Yes	Yes	0	No	0	1
No	39	Yes	Yes	Yes	Yes	0.157504	Yes	No	0	No	0	1
No	28	Yes	No	Yes	Yes	0.198913	Yes	No	0	No	0	1
No	27	Yes	No	Yes	Yes	0.203326	Yes	No	0	No	0
No	27	Yes	No	Yes	Yes	0.203326	Yes	No	0	No	0	1
No	23	No	No	No	Yes	0.302724	Yes	No	0	No	0	1
No	20	Yes	No	Yes	Yes	0.236247	Yes	No	0	No	0	1
No	28	Yes	No	No	Yes	0.282674	Yes	No	0	No	0
Yes	20	Yes	No	No	No	0.475524	Yes	No	0	No	0	1
No	25	Yes	No	No	Yes	0.299677	Yes	Yes	0	No	0
No	22	Yes	No	Yes	Yes	0.226479	Yes	No	0	No	0
No	27	Yes	No	No	Yes	0.288276	Yes	No	0	No	0	1
No	28	Yes	Yes	Yes	Yes	0.201847	Yes	No	0	Yes	0
Yes	27	Yes	Yes	Yes	No	0.324362	Yes	No	0	No	0	1
No	27	Yes	Yes	No	Yes	0.292047	Yes	No	0	No	0
No	32	Yes	Yes	Yes	Yes	0.184725	Yes	No	0	No	0	1
No	25	Yes	Yes	Yes	No	0.336515	Yes	No	0	Yes	0	1
No	37	Yes	Yes	No	No	0.366653	Yes	No	0	No	0
No	21	Yes	No	No	Yes	0.323229	Yes	No	0	No	0	1
No	32	Yes	Yes	No	Yes	0.264484	Yes	No	0	No	0	1
No	37	Yes	No	No	No	0.362412	Yes	Yes	1	No	1	1
No	38	Yes	No	No	Yes	0.230427	No	No		No	0
Yes	33	Yes	No	Yes	Yes	0.17793	Yes	No	0	No	0	1
No	40	Yes	No	No	No	0.343595	Yes	Yes	1	No	1
No	25	Yes	No	No	Yes	0.299677	Yes	No	0	No	0
Yes	23	Yes	No	No	Yes	0.311331	Yes	No	0	No	0	1
No	26	Yes	No	No	Yes	0.293944	Yes	No	0	No	0	1
No	39	Yes	Yes	Yes	Yes	0.157504	Yes	No	0	No	0	1
No	20	Yes	No	No	Yes	0.329266	Yes	No	0	No	0	1
No	28	Yes	No	No	Yes	0.282674	No	Yes		No	0
No	20	Yes	No	Yes	Yes	0.236247	Yes	No	0	No	0
No	19	Yes	No	No	Yes	0.33536	Yes	No	0	No	0	1
No	19	Yes	Yes	No	Yes	0.339454	No	No		No	0	1
Yes	21	Yes	No	Yes	Yes	0.231327	Yes	No	0	No	0	1
No	23	Yes	No	No	Yes	0.311331	Yes	No	0	No	0
No	32	Yes	Yes	No	No	0.399087	Yes	Yes	1	No	1
No	35	Yes	Yes	No	Yes	0.248768	Yes	No	0	Yes	0
Yes	28	Yes	Yes	No	No	0.425704	Yes	No	0	No	0	1
Yes	26	Yes	No	No	Yes	0.293944	Yes	Yes	0	No	0	1
Yes	19	Yes	No	No	Yes	0.33536	Yes	No	0	No	0	1
No	20	Yes	No	No	Yes	0.329266	Yes	No	0	Yes	0	1
No	20	Yes	No	No	Yes	0.329266	Yes	No	0	No	0
No	20	Yes	No	No	No	0.475524	Yes	No	0	No	0
No	20	Yes	Yes	No	No	0.480093	Yes	No	0	No	0	1
No	21	Yes	No	No	No	0.468679	Yes	No	0	No	0
No	21	Yes	No	No	Yes	0.323229	No	No		No	0
No	20	Yes	Yes	No	Yes	0.333323	Yes	No	0	No	0
No	21	Yes	No	No	No	0.468679	Yes	No	0	No	0
No	28	Yes	Yes	No	Yes	0.286401	Yes	Yes	1	No	1	1
No	29	Yes	No	No	Yes	0.277138	Yes	Yes	1	No	1
No	27	Yes	No	No	Yes	0.288276	Yes	No	0	No	0	1
Yes	27	Yes	No	No	Yes	0.288276	Yes	No	0	No	0	1
No	43	Yes	Yes	No	Yes	0.21	Yes	Yes	0	No	0	1
No	25	No	No	No	Yes	0.291256	Yes	No	0	No	0	1
No	25	Yes	No	No	Yes	0.299677	Yes	No	0	No	0
Yes	22	Yes	No	No	Yes	0.31725	Yes	No	0	No	0	1
No	23	Yes	No	No	Yes	0.311331	Yes	No	0	Yes	0
No	22	Yes	No	Yes	Yes	0.226479	Yes	No	0	No	0	1
No	22	Yes	No	No	Yes	0.31725	Yes	No	0	Yes	0	1
No	27	No	No	No	Yes	0.280047	Yes	No	0	No	0	1
No	27	Yes	No	No	Yes	0.288276	Yes	No	0	No	0
Yes	23	Yes	No	No	Yes	0.311331	Yes	No	0	No	0	1
No	22	Yes	No	No	Yes	0.31725	Yes	No	0	No	0
No	25	Yes	No	No	Yes	0.299677	Yes	No	0	No	0	1
No	20	Yes	Yes	Yes	Yes	0.239567	Yes	No	0	No	0
No	23	Yes	No	Yes	Yes	0.221703	Yes	No	0	No	0
No	22	Yes	No	No	Yes	0.31725	No	No		No	0	1
No	18	Yes	No	Yes	Yes	0.246302	No	No		Yes	0	1
No	27	Yes	No	No	Yes	0.288276	No	No		No	0
No	39	Yes	Yes	Yes	Yes	0.157504	Yes	Yes	0	No	0
Yes	20	Yes	Yes	No	Yes	0.333323	No	No		No	0	1
No	30	No	No	Yes	No	0.294222	Yes	No	0	No	0	1
Yes	35	Yes	Yes	No	Yes	0.248768	Yes	Yes	1	No	1	1
No	28	Yes	Yes	No	Yes	0.286401	Yes	No	0	Yes	0
No	27	Yes	No	No	No	0.427943	No	No		No	0	1
Yes	27	Yes	Yes	No	Yes	0.292047	Yes	No	0	No	0	1
No	27	Yes	Yes	Yes	Yes	0.206308	Yes	No	0	No	0
Yes	23	No	Yes	No	No	0.449541	Yes	No	0	No	0	1
No	35	Yes	No	No	Yes	0.245362	Yes	Yes	0	Yes	0
No	32	Yes	Yes	No	Yes	0.264484	Yes	Yes	0	No	0	1
Yes	25	Yes	Yes	No	Yes	0.303534	Yes	No	0	No	0	1
Yes	22	Yes	No	Yes	Yes	0.226479	Yes	No	0	No	0	1
No	22	No	Yes	No	No	0.456347	Yes	No	0	No	0	1
Yes	21	Yes	Yes	No	Yes	0.327247	Yes	No	0	No	0	1
No	19	Yes	No	No	Yes	0.33536	Yes	No	0	No	0	1
Yes	19	Yes	No	No	Yes	0.33536	Yes	No	0	No	0	1
No	25	Yes	Yes	Yes	Yes	0.215449	Yes	No	0	Yes	0	1
No	26	No	Yes	No	Yes	0.289369	Yes	No	0	No	0	1
Yes	24	Yes	Yes	Yes	Yes	0.220128	Yes	No	0	No	0	1
No	27	Yes	Yes	Yes	Yes	0.206308	Yes	No	0	No	0
Yes	26	Yes	Yes	Yes	Yes	0.210842	Yes	No	0	No	0	1
No	27	Yes	Yes	No	No	0.432432	Yes	No	0	No	0
No	21	Yes	No	No	No	0.468679	Yes	No	0	Yes	0
No	25	No	No	No	Yes	0.291256	Yes	No	0	No	0
No	32	Yes	Yes	No	Yes	0.264484	Yes	Yes		No	0
Yes	22	No	No	No	Yes	0.308553	Yes	No	0	No	0	1
No	22	Yes	Yes	No	Yes	0.321229	Yes	No	0	No	0
Yes	22	Yes	No	No	Yes	0.31725	Yes	No	0	No	0	1
Yes	29	Yes	No	Yes	Yes	0.194573	Yes	No	0	No	0	1
No	30	No	Yes	No	Yes	0.26731	Yes	No	0	Yes	0
Yes	25	No	No	No	Yes	0.291256	Yes	No	0	No	0	1
No	27	Yes	No	No	Yes	0.288276	Yes	No	0	No	0
Yes	20	Yes	Yes	No	Yes	0.333323	Yes	No	0	No	0	1
No	21	Yes	No	No	Yes	0.323229	No	No		No	0
Yes	18	No	Yes	No	Yes	0.336548	Yes	Yes	0	No	0	1
No	23	Yes	Yes	No	No	0.459571	Yes	No	0	No	0	1
No	27	No	No	No	Yes	0.280047	Yes	Yes	1	No	1
Yes	24	Yes	Yes	Yes	Yes	0.220128	No	Yes		No	0	1
No	20	No	Yes	No	Yes	0.324394	Yes	No	0	No	0	1
No	30	No	No	No	No	0.398169	No	Yes		No	0	1
No	25	Yes	No	No	No	0.441441	Yes	No	0	No	0
No	38	Yes	Yes	No	Yes	0.23369	No	Yes		Yes	0
Yes	35	No	No	No	No	0.365764	Yes	Yes		No	0	1
No	23	Yes	No	No	Yes	0.311331	Yes	No	0	No	0	1
Yes	23	Yes	Yes	No	Yes	0.31527	Yes	No	0	No	0	1
No	19	Yes	No	Yes	Yes	0.241238	No	No		No	0
No	22	Yes	No	No	Yes	0.31725	Yes	No	0	No	0
No	25	No	No	No	No	0.431491	Yes	No	0	No	0
No	20	No	No	No	Yes	0.320394	Yes	Yes	0	No	0
No	23	No	No	No	Yes	0.302724	Yes	No	0	No	0	1
No	22	Yes	No	No	No	0.461846	Yes	No	0	No	0
No	22	Yes	Yes	No	Yes	0.321229	Yes	No	0	No	0	1
No	31	No	Yes	No	No	0.395977	Yes	Yes	1	No	1
No	30	No	Yes	No	No	0.402565	Yes	No	0	No	0	1
No	35	Yes	Yes	No	Yes	0.248768	Yes	No	0	No	0
No	27	Yes	Yes	Yes	Yes	0.206308	Yes	No	0	No	0	1
No	42	Yes	Yes	Yes	Yes	0.146875	Yes	Yes	1	No	1
No	22	Yes	No	No	Yes	0.31725	Yes	No	0	No	0	1
No	27	Yes	No	Yes	Yes	0.203326	Yes	No	0	Yes	0
No	27	Yes	No	Yes	Yes	0.203326	Yes	No	0	No	0
No	18	Yes	No	No	No	0.48924	Yes	No	0	No	0	1
No	19	No	No	Yes	Yes	0.233911	No	No		No	0	1
No	28	Yes	No	No	Yes	0.282674	Yes	No	0	No	0	1
No	22	Yes	Yes	Yes	Yes	0.229703	Yes	No	0	No	0
No	24	No	No	No	No	0.438241	Yes	No	0	No	0	1
No	20	Yes	No	Yes	Yes	0.236247	Yes	No	0	No	0
No	21	Yes	No	Yes	Yes	0.231327	Yes	No	0	Yes	0
No	21	Yes	No	No	Yes	0.323229	No	No		No	0	1
No	19	Yes	No	Yes	Yes	0.241238	Yes	No	0	No	0
No	18	Yes	No	Yes	Yes	0.246302	Yes	No	0	No	0
No	32	Yes	No	No	Yes	0.260937	Yes	No	0	No	0
No	28	No	Yes	Yes	Yes	0.195408	Yes	No	0	No	0
No	29	Yes	Yes	No	Yes	0.280821	Yes	No	0	No	0
No	20	Yes	No	Yes	No	0.363584	Yes	No	0	No	0
No	22	Yes	No	Yes	No	0.35097	Yes	No	0	No	0	1
No	20	Yes	No	No	No	0.475524	Yes	No	0	No	0	1
No	26	Yes	Yes	Yes	Yes	0.210842	Yes	No	0	No	0
No	20	Yes	No	No	Yes	0.329266	Yes	No	0	No	0	1
Yes	28	Yes	No	Yes	Yes	0.198913	Yes	No	0	No	0	1
No	21	Yes	No	Yes	Yes	0.231327	Yes	No	0	No	0	1
No	18	Yes	No	Yes	Yes	0.246302	Yes	No	0	No	0
No	27	Yes	Yes	No	Yes	0.292047	Yes	No	0	No	0	1
No	20	Yes	No	Yes	Yes	0.236247	Yes	No	0	No	0
No	20	Yes	No	Yes	Yes	0.236247	Yes	No	0	No	0	1
No	20	Yes	No	Yes	Yes	0.236247	Yes	No	0	No	0
No	19	Yes	No	Yes	Yes	0.241238	Yes	No	0	No	0
No	30	Yes	No	Yes	Yes	0.190304	Yes	No	0	No	0
No	23	Yes	No	No	Yes	0.311331	Yes	No	0	No	0
No	21	Yes	No	Yes	Yes	0.231327	Yes	No	0	No	0	1
No	23	Yes	No	No	Yes	0.311331	Yes	No	0	Yes	0	1
No	28	No	Yes	Yes	No	0.309658	Yes	No	0	No	0
Yes	27	Yes	No	No	Yes	0.288276	Yes	Yes	1	No	1	1
No	22	Yes	No	No	Yes	0.31725	Yes	No	0	No	0	1
No	21	Yes	No	Yes	Yes	0.231327	Yes	No	0	No	0
No	24	No	No	No	No	0.438241	Yes	No		No	0	1
No	30	Yes	Yes	Yes	Yes	0.193142	Yes	No	0	No	0
No	22	Yes	No	No	No	0.461846	Yes	No	0	No	0
No	18	Yes	No	No	No	0.48924	Yes	No	0	No	0	1
No	30	Yes	No	No	Yes	0.271669	Yes	No	0	No	0	1
No	27	No	Yes	No	Yes	0.283754	Yes	Yes	0	No	0
No	25	No	Yes	Yes	Yes	0.208689	Yes	No	0	No	0
Yes	21	Yes	No	Yes	Yes	0.231327	Yes	No	0	No	0	1
Yes	22	Yes	No	No	Yes	0.31725	Yes	No	0	No	0	1
No	25	Yes	No	No	No	0.441441	Yes	No	0	No	0	1
No	19	Yes	Yes	No	Yes	0.339454	No	No		No	0	1
No	20	Yes	No	No	No	0.475524	No	No		No	0	1
No	22	Yes	No	No	Yes	0.31725	No	No		No	0	1
No	22	No	Yes	Yes	No	0.345943	Yes	No	0	No	0
Yes	22	Yes	No	No	No	0.461846	Yes	No	0	No	0	1
No	18	Yes	No	No	No	0.48924	Yes	No	0	No	0	1
No	22	No	No	No	No	0.451808	No	No		Yes	0
No	20	Yes	No	No	No	0.475524	No	No		No	0	1
No	35	Yes	Yes	Yes	Yes	0.172637	Yes	Yes	1	No	1
Yes	19	Yes	No	No	Yes	0.33536	No	No		No	0	1
No	25	Yes	Yes	No	Yes	0.303534	Yes	No	0	No	0	1
No	20	Yes	No	No	No	0.475524	Yes	No	0	No	0	1
No	20	Yes	No	Yes	Yes	0.236247	Yes	No	0	No	0
No	20	Yes	No	Yes	Yes	0.236247	Yes	No	0	No	0	1
No	21	Yes	Yes	Yes	No	0.361468	Yes	No	0	No	0
No	22	Yes	Yes	Yes	Yes	0.229703	Yes	No	0	No	0
No	24	Yes	No	Yes	Yes	0.217	Yes	No	0	No	0	1
No	23	No	Yes	No	No	0.449541	Yes	No	0	No	0	1
No	25	Yes	Yes	Yes	Yes	0.215449	Yes	No	0	No	0	1
No	24	No	No	Yes	Yes	0.210205	Yes	No	0	No	0
No	28	No	Yes	Yes	No	0.309658	Yes	No	0	No	0
No	20	Yes	No	No	Yes	0.329266	Yes	No	0	No	0	1
No	18	Yes	No	No	No	0.48924	Yes	No	0	No	0	1
No	21	Yes	Yes	Yes	Yes	0.234599	Yes	No	0	No	0	1
No	20	Yes	No	No	No	0.475524	Yes	No	0	No	0
No	22	Yes	No	Yes	Yes	0.226479	Yes	No	0	No	0	1
No	25	Yes	Yes	No	No	0.445961	Yes	No	0	No	0	1
No	24	Yes	Yes	No	Yes	0.309371	Yes	No	0	No	0	1
No	20	No	No	No	No	0.465446	Yes	No	0	No	0
No	19	Yes	No	No	Yes	0.33536	Yes	No	0	No	0	1
No	23	Yes	No	Yes	Yes	0.221703	Yes	No	0	No	0
No	20	Yes	No	No	No	0.475524	Yes	No	0	No	0	1
No	18	Yes	No	No	No	0.48924	Yes	No	0	No	0	1
No	20	Yes	No	No	Yes	0.329266	Yes	No	0	No	0	1
No	21	Yes	No	Yes	Yes	0.231327	Yes	No	0	No	0
No	18	Yes	Yes	No	Yes	0.34564	Yes	No	0	No	0	1
No	20	Yes	Yes	No	No	0.480093	Yes	No	0	No	0
No	18	Yes	No	Yes	No	0.376387	Yes	No	0	No	0
No	23	Yes	No	No	Yes	0.311331	Yes	No	0	No	0	1
Yes	24	No	Yes	No	No	0.442754	Yes	No	0	No	0	1
No	24	Yes	Yes	Yes	Yes	0.220128	Yes	No	0	No	0	1
No	21	Yes	No	Yes	Yes	0.231327	Yes	No	0	No	0	1
No	23	Yes	No	Yes	Yes	0.221703	Yes	No	0	No	0
Yes	20	Yes	No	Yes	Yes	0.236247	Yes	No	0	No	0	1
No	22	Yes	Yes	Yes	Yes	0.229703	Yes	No	0	No	0
Yes	27	Yes	Yes	No	Yes	0.292047	Yes	No	0	No	0	1
No	19	Yes	No	Yes	Yes	0.241238	Yes	No	0	No	0	1
No	21	Yes	Yes	Yes	No	0.361468	Yes	No	0	No	0
No	36	No	No	No	Yes	0.233004	Yes	No	0	No	0
No	20	Yes	No	Yes	No	0.363584	Yes	No	0	No	0
No	27	Yes	Yes	No	Yes	0.292047	Yes	No	0	No	0
No	23	No	Yes	No	No	0.449541	Yes	No	0	No	0	1
No	19	Yes	No	Yes	Yes	0.241238	Yes	No	0	No	0
No	19	Yes	No	Yes	Yes	0.241238	Yes	No	0	No	0
No	21	Yes	No	No	Yes	0.323229	Yes	No	0	No	0	1
No	21	Yes	Yes	No	Yes	0.327247	Yes	No	0	No	0	1
No	22	Yes	No	No	No	0.461846	Yes	No	0	No	0	1
No	22	Yes	Yes	No	No	0.4664	Yes	No	0	No	0
No	19	Yes	No	No	No	0.482379	Yes	No	0	No	0	1
No	22	No	No	No	Yes	0.308553	Yes	No	0	Yes	0
No	23	Yes	Yes	Yes	Yes	0.224879	Yes	No	0	No	0
No	20	No	Yes	No	No	0.470005	Yes	Yes	1	No	1	1
No	22	Yes	Yes	Yes	Yes	0.229703	Yes	No	0	No	0
No	20	No	No	Yes	Yes	0.229025	Yes	No	0	No	0
No	28	No	Yes	No	No	0.415844	Yes	Yes	1	No	1	1
No	23	Yes	No	Yes	Yes	0.221703	Yes	No	0	No	0
No	29	Yes	Yes	No	No	0.419003	Yes	No	0	No	0
No	23	No	Yes	Yes	Yes	0.217906	Yes	No	0	No	0	1
No	30	No	Yes	Yes	Yes	0.186916	Yes	No	0	No	0
No	21	Yes	No	No	Yes	0.323229	Yes	No	0	No	0
No	22	Yes	No	No	Yes	0.31725	Yes	No	0	No	0	1
No	28	No	Yes	Yes	Yes	0.195408	No	No		No	0	1
No	24	Yes	No	No	Yes	0.305472	Yes	No	0	No	0
No	21	Yes	No	No	Yes	0.323229	Yes	No	0	No	0
No	20	Yes	Yes	No	Yes	0.333323	Yes	No	0	No	0	1
No	20	No	No	No	Yes	0.320394	Yes	No	0	No	0	1
No	18	No	No	No	No	0.479136	Yes	No	0	No	0	1
No	30	No	Yes	No	Yes	0.26731	Yes	No	0	No	0	1
No	20	Yes	No	No	No	0.475524	Yes	No	0	No	0	1
No	21	Yes	No	No	Yes	0.323229	Yes	No	0	No	0
No	22	Yes	Yes	No	Yes	0.321229	Yes	No	0	No	0	1
No	24	No	No	Yes	No	0.329562	Yes	No	0	No	0
No	21	Yes	No	Yes	Yes	0.231327	Yes	No	0	No	0
No	20	Yes	Yes	Yes	No	0.367831	Yes	No	0	No	0	1
No	23	Yes	Yes	No	No	0.459571	Yes	No	0	No	0	1
No	22	Yes	Yes	No	Yes	0.321229	Yes	No	0	No	0	1
No	26	No	Yes	No	Yes	0.289369	Yes	Yes	0	No	0
Yes	29	No	Yes	No	Yes	0.272723	Yes	No	0	No	0	1
No	21	Yes	No	No	Yes	0.323229	Yes	No	0	No	0	1
No	18	Yes	Yes	No	No	0.493816	No	No		No	0	1
No	21	Yes	No	No	Yes	0.323229	Yes	No	0	No	0	1
No	25	Yes	Yes	No	Yes	0.303534	Yes	No	0	Yes	0	1
No	16	Yes	No	No	No	0.502971	Yes	No	0	No	0	1
No	21	Yes	Yes	Yes	Yes	0.234599	Yes	No	0	No	0	1
No	20	No	Yes	No	Yes	0.324394	Yes	No	0	No	0
No	19	No	No	Yes	Yes	0.233911	No	No		No	0
No	22	Yes	Yes	Yes	Yes	0.229703	Yes	No	0	No	0	1
No	23	Yes	No	Yes	Yes	0.221703	Yes	No	0	No	0	1
Yes	18	Yes	No	No	Yes	0.34151	Yes	No	0	Yes	0	1
No	19	Yes	No	Yes	No	0.369963	Yes	No	0	No	0
No	24	No	No	Yes	Yes	0.210205	Yes	Yes	0	No	0	1
No	25	No	Yes	No	No	0.435989	Yes	No	0	No	0
No	21	Yes	Yes	Yes	Yes	0.234599	Yes	No	0	No	0
No	27	No	Yes	Yes	No	0.31556	Yes	No	0	No	0
No	20	No	Yes	No	Yes	0.324394	Yes	No	0	No	0	1
No	19	Yes	No	No	No	0.482379	Yes	No	0	No	0	1
No	22	Yes	No	No	Yes	0.31725	Yes	No	0	No	0
No	19	Yes	No	No	No	0.482379	Yes	No	0	No	0	1
Yes	24	No	No	No	No	0.438241	Yes	No	0	No	0	1
No	27	Yes	Yes	No	Yes	0.292047	Yes	No	0	No	0	1
No	22	Yes	No	Yes	Yes	0.226479	No	No		No	0
No	20	Yes	No	No	Yes	0.329266	Yes	No	0	No	0	1
No	21	Yes	No	No	Yes	0.323229	No	No		No	0	1
No	20	Yes	No	Yes	Yes	0.236247	No	No		No	0
No	26	Yes	No	Yes	Yes	0.207812	Yes	No	0	No	0	1
No	27	No	Yes	No	Yes	0.283754	Yes	No	0	No	0	1
No	35	No	Yes	No	No	0.370022	Yes	Yes	0	No	0	1
No	21	Yes	No	Yes	Yes	0.231327	Yes	No	0	No	0	1
No	30	Yes	No	No	Yes	0.271669	Yes	No	0	No	0
No	21	Yes	No	No	Yes	0.323229	Yes	No	0	No	0	1
No	23	Yes	Yes	No	Yes	0.31527	Yes	No	0	No	0
No	23	Yes	Yes	Yes	Yes	0.224879	Yes	Yes	1	No	1
No	21	Yes	No	No	No	0.468679	No	No		No	0
No	23	No	Yes	No	No	0.449541	Yes	No	0	No	0
Yes	20	No	Yes	No	No	0.470005	Yes	No	0	No	0	1
No	33	No	Yes	No	No	0.382916	Yes	Yes	1	No	1
No	25	No	No	No	Yes	0.291256	No	No		No	0	1
No	24	Yes	Yes	Yes	Yes	0.220128	Yes	No	0	No	0	1
Yes	24	Yes	No	No	Yes	0.305472	Yes	No	0	No	0	1
No	25	No	No	No	No	0.431491	Yes	No	0	No	0
Yes	18	Yes	Yes	No	No	0.493816	Yes	No	0	No	0	1
No	25	Yes	Yes	No	Yes	0.303534	Yes	No	0	No	0	1
